# Supplementary material for: Are neighbourhood food resources distributed inequitably by income and race in the USA? Epidemiological findings across the urban spectrum
Source: PubMed Central journal article supplement — BMJ Open. 2012 Apr 13;2(2):e000698. doi: 10.1136/bmjopen-2011-000698 (PMC3329604; doi:10.1136/bmjopen-2011-000698), 2012-04-13
Supplement: bmjopen-2011-000698.draft_revisions.pdf [file bmjopen-2011-000698.draft_revisions.pdf]

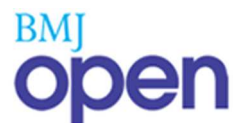

**Are neighborhood food resources distributed inequitably by income and race? Epidemiologic findings across the urban spectrum**

|                                 |                                                                                                                                                                                                                                         |
|---------------------------------|-----------------------------------------------------------------------------------------------------------------------------------------------------------------------------------------------------------------------------------------|
| Journal:                        | <i>BMJ Open</i>                                                                                                                                                                                                                         |
| Manuscript ID:                  | bmjopen-2011-000698                                                                                                                                                                                                                     |
| Article Type:                   | Research                                                                                                                                                                                                                                |
| Date Submitted by the Author:   | 20-Dec-2011                                                                                                                                                                                                                             |
| Complete List of Authors:       | Richardson, Andrea; UNC Chapel Hill, Nutrition<br>Boone-Heinonen, Janne; Oregon Health & Science University, Public Health & Preventive Medicine<br>Popkin, Barry; UNC Chapel Hill, Nutrition<br>Gordon-Larsen, Penny; UNC Chapel Hill, |
| <b>Primary Subject Heading</b>: | Epidemiology                                                                                                                                                                                                                            |
| Secondary Subject Heading:      | Public health                                                                                                                                                                                                                           |
| Keywords:                       | NUTRITION & DIETETICS, PUBLIC HEALTH, STATISTICS & RESEARCH METHODS                                                                                                                                                                     |
|                                 |                                                                                                                                                                                                                                         |

SCHOLARONE™  
Manuscripts

1  
2  
3 **Are neighborhood food resources distributed inequitably by income and race?**  
4

5 **Epidemiologic findings across the urban spectrum**  
6

7  
8 Andrea S. Richardson<sup>1</sup>, Janne Boone-Heinonen<sup>2</sup>, Barry M. Popkin<sup>1</sup>, and Penny Gordon-Larsen<sup>1</sup>  
9

10  
11 <sup>1</sup>Department of Nutrition, University of North Carolina at Chapel Hill; Carolina Population  
12 Center, 123 West Franklin St. Campus Box 8120, Chapel Hill, NC USA  
13

14  
15 <sup>2</sup>Public Health & Preventive Medicine, Oregon Health & Science University; 3181 SW Sam  
16 Jackson Park Road, Mail Code CB 669, Portland, OR 97239-3098, USA  
17  
18

19  
20 Please Address Correspondence & Reprint Requests To:  
21

22  
23 Penny Gordon-Larsen  
24

25  
26 University of North Carolina at Chapel Hill  
27

28  
29 Carolina Population Center  
30

31  
32 123 West Franklin St. CB#8120  
33

34  
35 Chapel Hill, NC 27516-3997, USA  
36

37  
38 Phone: (W) 919-843-9966; Fax: 919-966-9159  
39  
40  
41  
42  
43  
44  
45  
46  
47

48 **Keywords (MeSH\*):** Epidemiology, United States, \*Diet, Geographic Information Systems,  
49 Environment, Environment Design, Fast Foods, Restaurants, Young Adult  
50

51  
52 Abstract 295 words  
53

54  
55 Text 3056 words excluding title page, abstract, references, and tables  
56  
57  
58  
59  
60

1  
2  
3  
4  
5  
6  
7  
8  
9  
10  
11  
12  
13  
14  
15  
16  
17  
18  
19  
20  
21  
22  
23  
24  
25  
26  
27  
28  
29  
30  
31  
32  
33  
34  
35  
36  
37  
38  
39  
40  
41  
42  
43  
44  
45  
46  
47  
48  
49  
50  
51  
52  
53  
54  
55  
56  
57  
58  
59  
60

## SUMMARY

### 1) Article Focus

- Most research on socioeconomic inequities in neighborhood food environments are conducted in dense, urban areas, focus on supermarkets, and do not address the potential joint role of neighborhood race/ethnic composition and neighborhood income.
- In a national sample, we examine inequities in neighborhood food availability according to joint combinations of neighborhood poverty and minority population across non-urban, low-density, and high-density urban areas.

### 2) Key Messages

- Sociodemographic inequities in grocery/supermarket, convenience store, and fast-food restaurant availability were most pronounced in low density urban (largely suburban) areas.
- In high density urban areas, higher neighborhood poverty was associated with greater availability of all food resources.
- While many state and national efforts focus on providing healthy eating options in poor, inner-city neighborhoods, our results suggest that less urban areas might benefit from similar policies.

### 3) Strengths and Limitations

- This study benefits from several innovations and depth of coverage that has been heretofore unaddressed in a large, geographically diverse study.
- While secondary food environment data from business records may have introduced error and do not provide foods sold at each establishment, these limitations are outweighed by the ability to address comparable data across the full US (i.e., thousands of census blocks groups).
- The most significant strength of the study is the ability to examine variation in neighborhoods across the US, which enables comparisons across multiple sociodemographic and urban strata within a single study.
- Other strengths include the attention to a variety of food resources, two dimensions of neighborhood socioeconomic status, and examination of small neighborhood areas within the context of a national geographic scope.

## Abstract

**Objective.** While there is much recent policy attention to inequities in availability of healthy food stores and restaurants, there is little understanding of how such inequities vary across neighborhood poverty, race, and urbanicity. Largely this gap is due to lack of large studies that capture diverse geographic and sociodemographic populations. Using a national sample, we examined disparities in neighborhood food availability across non-urban, low- and high-density urban areas.

**Design.** Cross-sectional data from a national, observational epidemiologic cohort study.

**Participants.** Using neighborhood characteristics of participants in the National Longitudinal Study of Adolescent Health (Wave III, 2001-02; n=13,995 young adults representing 7,588 US block groups), we examined associations between neighborhood poverty and race/ethnicity with neighborhood food resources in urbanicity-stratified multivariable linear regression.

**Primary and Secondary outcome measures:** Neighborhood availability of grocery/supermarkets, convenience stores, and fast food restaurants (measured as number of outlets per 100 km roadway).

**Results.** Neighborhood race and income disparities were most pronounced in low density urban areas, where high poverty/high minority areas had lower availability of grocery/supermarkets [beta coefficient (beta)= -1.91; 95% confidence interval (CI) -2.73, -1.09] and convenience stores (beta=-2.38, CI: -3.62, -1.14) and greater availability of fast food restaurants (beta=4.87, CI: 2.26, 7.48) than low poverty/low minority areas. However, in the dense, urban areas, high poverty/low minority neighborhoods had comparatively greater availability of grocery/supermarkets (beta=8.05, CI: 2.52, 13.57), convenience stores (beta=2.89,

1  
2  
3 CI: 0.64-5.14), and fast food (beta=4.03, CI: 1.97, 6.09), relative to low poverty/low minority  
4  
5 areas.  
6  
7

8 **Conclusions.** In addition to targeting disproportionate fast food availability in disadvantaged  
9  
10 dense urban areas, our findings suggest that policies should also target disparities in  
11  
12 grocery/supermarket and fast food restaurant availability in low density areas. To better inform  
13  
14 policy, distinct social and economic drivers of food resource allocation across urban, suburban,  
15  
16 and rural areas should be explored.  
17  
18  
19  
20  
21  
22  
23  
24  
25  
26  
27  
28  
29  
30  
31  
32  
33  
34  
35  
36  
37  
38  
39  
40  
41  
42  
43  
44  
45  
46  
47  
48  
49  
50  
51  
52  
53  
54  
55  
56  
57  
58  
59  
60

## INTRODUCTION

National, state, and local policies increasingly focus on improving availability of healthy foods in disadvantaged neighborhoods. Expectations that such policies will improve diets in low income and race/ethnic minority populations stem from evidence that inequitable access to healthy foods may underlie differentials in diet quality [1-3], obesity [4], and related diseases by income and race/ethnicity (see reviews [5-8]). However, understanding the extent to which inequities in different types of food resources exist in different types of U.S. communities is limited by several factors.

First, research has focused on “food deserts”, generally defined as areas with limited access to affordable fresh foods from supermarkets (see reviews [5-8]). Subsequently, “food swamps” [9], characterized as neighborhoods with disproportionate access to convenient, energy dense, nutrient poor foods sold by convenience stores and fast food restaurants, emerged as important dimensions of the food environment. Thus, attention to a variety of food resources, such as supermarkets, convenience stores, and fast food restaurants, may be a more useful approach to examining neighborhood food access [8, 10].

Second, most existing food access initiatives target low income, dense urban areas, yet suburban and rural areas may be even more sensitive to the food environment due to shifting demographic compositions and car-dependent infrastructure. Yet few studies examine variation in availability of food resources by urbanicity [6, 11-13].

Third, allocation of food resources according to income has received the most focus, with some examination of race/ethnic differences. Patterning by race/ethnicity may further compound patterning according to income and would underscore the importance of culturally sensitive

1  
2  
3 policies. However, the joint role of neighborhood race/ethnic composition and neighborhood  
4  
5 income has received little attention.  
6  
7

8 Our GIS-derived neighborhood characteristics from a national sample of 13,995 young  
9  
10 adults living throughout the US captured many types of food resources and provided variation in  
11  
12 individual-level and neighborhood-level characteristics required to examine disparities in food  
13  
14 resource availability according to income, race/ethnicity, and urbanicity. With our unique data,  
15  
16 we characterize food resource availability as the count of several types of resources per roadway  
17  
18 distance within a 3 kilometer street network buffer, which represents access to resources relative  
19  
20 to the street network potentially reflecting routes of travel [14]. To address vast variation in  
21  
22 measures of the food environment across published studies, we present findings using different  
23  
24 neighborhood definitions and density calculations to facilitate comparisons with published  
25  
26 literature.  
27  
28  
29  
30

31 We examined the joint role of neighborhood race/ethnic composition and neighborhood  
32  
33 income across non-urban, low density urban, and high density urban areas. Specifically, we  
34  
35 tested if individuals living in neighborhoods comprised of populations with high proportions of  
36  
37 low income and minority residents had lower availability of grocery/supermarkets and greater  
38  
39 availability of fast-food restaurants and convenience stores (compared to areas with high  
40  
41 proportion of high income and non-minority populations), and whether this distribution varied  
42  
43  
44  
45  
46 across less urban and more urban areas.  
47  
48  
49  
50  
51  
52  
53  
54  
55  
56  
57  
58  
59  
60

## METHODS

### Study population and data sources

Our study sample is derived from respondents aged 18 to 24 years who participated in Wave III (2001-02) of the National Longitudinal Study of Adolescent Health (Add Health), a nationally representative, prospective cohort study of adolescents of the US school-based population in grades 7 to 12 (11-22 years of age) in 1994-95 who are followed into adulthood (wave III). Subjects eligible for inclusion in the analytic sample included 14,322 Wave III young adults with sample weights. The Add Health sample was collected under protocols approved by the Institutional Review Board at the University of North Carolina. The survey design and sampling frame have been discussed elsewhere [15, 16]. The authors have no conflicts of interest to declare and have each made 1) substantial contributions to conception and design, acquisition of data, or analysis and interpretation of data; 2) drafting the article or revising it critically for important intellectual content; and 3) final approval of the version to be published.

We used the Add Health Obesity and Neighborhood Environment database (ONEdata), a Geographic Information System that includes time-varying, community-level data geographically-linked to respondent residential addresses geocoded with street-segment matches (n=13,039), global positioning system (GPS) measurements (n=1,204), and ZIP/ZIP+4/ZIP+2 centroid match (n=685). Attributes of areas within 1, 3, 5, and 8.05 km of each respondent location (neighborhood buffers) and block group, tract, and county attributes from time-matched U.S. Census and other federal sources were merged with individual-level Add Health interview responses [17]. The number of census block groups (n=7,588) represents 3.6% of 2000 US Census block groups.



1  
2  
3 Of 14,322 Wave III respondents with sample weights, 327 (2.3%) with missing food  
4 environment or US census data were excluded, leaving an analytic sample of 13,995.  
5  
6  
7  
8  
9

## 10 **Study variables**

### 11 *GIS-derived neighborhood data*

12  
13 For our central analysis we used residential locations linked to attributes of areas within 3  
14 km straight line distance (Euclidean buffer) and along the street network for (street network  
15 buffer) surrounding each respondent's residential location in the Wave III (2001). The 3 km  
16 buffer has been shown to be relevant for assessing associations between neighborhood resources  
17 and individual level behavior [18]. Comparative analyses were conducted with 1 and 8 km  
18 buffers. Neighborhood food environment, sociodemographic, and urban indicator data were  
19 merged with individual-level Add Health interview data.  
20  
21  
22  
23  
24  
25  
26  
27  
28  
29  
30  
31  
32  
33

### 34 *Food environment*

35  
36 Food resource data were obtained from Dun and Bradstreet, a commercial dataset of US  
37 businesses. Food resources were classified according to 4- and 8-digit Standard Industrial  
38 Classification (SIC) codes. Three categories of food resources were used: 1) fast-food  
39 restaurants, defined as fast-food chain and non-chain restaurants, excluding food stands and  
40 cafeterias; 2) grocery stores and supermarkets, defined as independent and chain grocery stores  
41 and supermarkets; and 3) convenience stores, defined as variety & convenience stores and food  
42 stores attached to gasoline filling stations. Full details are described in Appendix A.  
43  
44  
45  
46  
47  
48  
49  
50  
51  
52

53 Given the importance of scaling resources by general urban development, we created  
54 measures of resources per kilometers of secondary/connecting and local, neighborhood and rural  
55  
56  
57  
58  
59  
60

1  
2  
3 roads using street data obtained from StreetMap Pro (July 2003, v.5.2) data from Environmental  
4  
5 Systems Research Institute (ESRI, [www.esri.com](http://www.esri.com)) in Redlands, CA. We selected the 3km street  
6  
7 network buffer after evaluating associations with resource availability and sensitivity of buffer  
8  
9 size. We thus defined food resource availability as the number of outlets per 100 kilometer of  
10  
11 roadway within a 3 km network buffer to account for differences in food resource counts  
12  
13 according to the amount of commercial activity in an area.  
14  
15  
16  
17  
18  
19

### 20 *Neighborhood sociodemographics*

21  
22 Census block groups were used to define neighborhoods because smaller units are more  
23  
24 likely to adhere to individually perceived neighborhood boundaries [19] and are more  
25  
26 sociodemographically homogeneous. Using the federal definition of “poverty area” [20, 21], we  
27  
28 dichotomized neighborhood poverty into  $>20\%$  or  $\leq 20\%$  of population below the federal poverty  
29  
30 level. We defined neighborhood minority population as percent of population of non-Hispanic  
31  
32 white race/ethnicity and neighborhood-level education as percent of population  $\geq 25$  years with  
33  
34 college or greater education. To evaluate potential interaction of neighborhood poverty status  
35  
36 with minority population we created a categorical variable: 1) low poverty/low minority, 2) high  
37  
38 poverty/low minority, 3) low poverty/medium minority, 4) high poverty/medium minority, 5)  
39  
40 low poverty/high minority, 6) high poverty/high minority.  
41  
42  
43  
44  
45  
46  
47

### 48 *Neighborhood Urbanicity*

49  
50 US Census-defined urbanized areas (UA) were used to classify residential locations as  
51  
52 non-urban (outside UA) or urban (inside UA). Within urban areas, we used Fragstats [22]  
53  
54 software with US Geologic Survey National Landcover Data to distinguish: 1) low density  
55  
56 [ $\leq 95\%$  (75th percentile) developed land cover] and 2) high density [ $>95\%$  developed land cover]  
57  
58  
59  
60

1  
2  
3 urban areas based on the area of developed land as a proportion of total area within 3km after  
4  
5 excluding water and ice. Our measure of developed land cover provides an indicator of urban  
6  
7 development that is independent of population density and correctly classifies areas as within or  
8  
9 outside of a UA (Receiver Operating Characteristic curve area=0.937).  
10  
11  
12  
13

## 14 **Statistical analysis**

### 15 *Descriptive analysis*

16  
17  
18 Availability of food resources and sociodemographic characteristics were compared across non-  
19  
20 urban, low density urban, and high density urban strata. We examined urbanicity-specific tertiles  
21  
22 of neighborhood minority population (Table 1) to address non-linear associations with food  
23  
24 resource availability measures. All statistical analyses were weighted for national representation  
25  
26 and corrected for complex survey design using Stata 11.1 (Stata Corp, College Station, TX).  
27  
28  
29  
30  
31  
32  
33

### 34 *Multivariable regression analysis*

35  
36 We fit multivariable linear regression models to predict food resource availability as a function  
37  
38 of neighborhood poverty and minority population where our constructed variable combining  
39  
40 neighborhood poverty (high and low) with levels of minority population (low, medium, high)  
41  
42 explicitly estimates interactions relative to the theoretically most advantaged neighborhoods (low  
43  
44 poverty/low minority). Given that food resources and neighborhood sociodemographics varied  
45  
46 dramatically across urbanicity, comparability across sociodemographic and geographic  
47  
48 subpopulations was difficult, even with our large sample size. Nonetheless, we have large  
49  
50 samples of individuals and block groups across urbanicity strata, with adequate variation across  
51  
52 neighborhood sociodemographics (Table 1). All models were weighted for national  
53  
54  
55  
56  
57  
58  
59  
60

1  
2  
3 representation, corrected for clustering on our primary sampling unit (schools) and controlled for  
4  
5 continuous neighborhood-level education and population density dichotomized into urbanicity-  
6  
7 specific quantiles. Given that schools and census block groups are not geographically nested, we  
8  
9 did not use multi-level analysis. Further, multi-level analysis of unbalanced, sparse data within  
10  
11 census block groups can result in biased estimates [23].  
12  
13

14  
15 To aid interpretation of the model results, we used the estimated model coefficients to  
16  
17 predict food resource availability across levels of neighborhood-level poverty and minority  
18  
19 population within the low density-urban stratum, where the strongest disparities were observed.  
20  
21  
22  
23

## 24 **Comparative analyses**

25  
26  
27 In order to assess whether different neighborhood buffer sizes were needed in urban  
28  
29 versus non-urban areas, we compared and found similar patterns for the 1 km buffer in urban  
30  
31 areas and the 8 km buffer in non-urban areas. In addition, we assessed alternate measures of  
32  
33 food resource availability to compare our main measure findings with commonly used though  
34  
35 conceptually different metrics: count per population [2] and distance to nearest outlet [1, 10, 24].  
36  
37 Specifically, we contrasted our roadway-scaled measure with: 1) density of food resources per  
38  
39 10,000 population within 3 km Euclidean buffer; and 2) minimum distance to the single nearest  
40  
41 food resource within 8 km Euclidean buffer. We repeated identical multivariable regression  
42  
43 models with alternate measures, except models with population density measures did not control  
44  
45 for population density. Results for food resources per 100 kilometer of roadway within a 3 km  
46  
47 network buffer are presented in text, while results for all other measures are shown in the  
48  
49 Appendices B-C.  
50  
51  
52  
53  
54  
55  
56  
57  
58  
59  
60

## RESULTS

Availability of grocery/supermarkets, convenience stores, and fast food restaurants varied dramatically across non-urban, low density urban and high density urban areas, with more resources in high density urban areas (Table 2).

In multivariable analysis, availability of grocery/supermarkets and convenience stores for low density urban residents did not differ according to neighborhood poverty; rather, lower availability of food stores was observed with greater minority populations (Table 3). Food stores were more equitably allocated in non-urban neighborhoods. Interestingly, greater availability of food stores was often found in high density urban areas with high proportions of low income residents, but this relationship with neighborhood income did not hold in neighborhoods with high proportion of minority residents.

Fast food availability was greater for residents in high poverty neighborhoods, with strongest associations in low and high density urban areas (Table 3). Among those living in neighborhoods with high poverty, greater minority population incurred additional inequities in food resource availability, particularly in low density urban areas. In a notable exception, in high density urban, high minority areas, fast food was *less* available in high poverty neighborhoods.

Figure 1 presents predicted food resource availability (based on the Table 3 models) and more clearly illustrates the differential associations with poverty versus race/ethnicity in non-urban, low density urban, and high density urban areas.

In general, estimated patterns of disparities were very similar between roadway-scaled, population density and distance measures (Appendices B-C).

## DISCUSSION

We assessed inequities in grocery/supermarket, convenience store, and fast-food restaurant availability by neighborhood poverty and minority population in a large, diverse national sample of residential neighborhoods of young adults, representing 7,588 census block groups (3.6% of 2000 US Census block groups). Our findings suggest that inequities in food availability do exist, but not always where prior research suggests. In particular, racial and income disparities in availability of grocery/supermarkets were far more apparent in low density urban areas than in high density urban areas, where food deserts have been shown to exist [25-28]. In an unexpected finding, areas with high poverty and high minority population also have lower availability of convenience stores, which typically provide largely energy dense, nutrient poor foods [29, 30]. Greater availability of fast food in areas with high poverty rates and high minority population was more consistent across non-urban, low density urban and high density urban areas.

Differences in availability of grocery/supermarkets, convenience stores, and fast-food restaurants were most consistent in low density urban areas, which include the largest proportion of our sample and theoretically captures suburban America. In the US, we also note that the distribution of poverty has shifted away from the dense inner cities. Data from the 2010 census reports suggest that counter to the assumption of “White Flight” out of inner cities, racial minorities, foreign-born, and low income people were more likely to live in metropolitan suburbs in 2010 than the cities they lived in during 2008 [31]. Thus, the income and race/ethnic disparities in availability of healthy and unhealthy foods observed in low density urban areas in our 2001 data may become much more important as poor and minority populations increasingly reside in suburban neighborhoods. Our findings suggest that in addition to increasing grocery

1  
2  
3 store availability and limiting fast food availability in disadvantaged dense urban areas, rural and  
4  
5 suburban areas should be targeted for food environment improvements. While this idea has been  
6  
7 suggested by a series of studies in rural Texas [12], our national study further supports more  
8  
9 focus on rural and suburban food environments.  
10  
11

12 Relationships between food resource availability, neighborhood poverty, and minority  
13  
14 population were notably distinct in high density urban areas. First, our finding of *greater*  
15  
16 availability of grocery stores and convenience stores in high versus low poverty areas, but only  
17  
18 in areas with predominately white populations, suggests the presence of complex economic and  
19  
20 social drivers in where food stores choose to locate. Second, fast food availability was generally  
21  
22 greater in high poverty, high minority areas, but this was not true in high minority, high density  
23  
24 urban areas. This finding is consistent with prior evidence [8, 32] that perceived or real racial  
25  
26 tensions or safety concerns may also influence opening and closure of food establishments.  
27  
28  
29  
30

31 Findings using our main roadway scaled measures and population density measures were  
32  
33 nearly identical as they likely capture resources scaled by commercialization and development  
34  
35 indicated by population and roadways. Slight inconsistencies in results for the minimum  
36  
37 distance measures and may reflect increased variation that results from using a single data point  
38  
39 (nearest outlet) to characterize availability compared to incorporating data from multiple  
40  
41 resources within an area. Minimum distance measures also do not account for differential  
42  
43 distribution of food resources according to population and development density.  
44  
45  
46  
47  
48  
49

## 50 **Strengths and limitations**

51  
52 This study did not look at extreme poverty nor consider a large array of other factors  
53  
54 linked with urbanicity. It is possible that disparities in food resources in dense, urban areas may  
55  
56  
57  
58  
59  
60

1  
2  
3 be evident only under extreme neighborhood poverty that we did not examine in our analysis.  
4  
5 More refined analyses of dynamic effects among social and economic environments and food  
6  
7 resources are beyond the scope of the present analysis though they certainly warrant further  
8  
9 attention. Moreover, other factors such as crime [32], aesthetics [32], travel time [33], or  
10  
11 proximity to other resources [32] could also relate to actual or perceived access to food  
12  
13 resources.  
14  
15

16  
17 The benefit of business record data, which provides comparative national food resource  
18  
19 data, must be balanced with their limitations. Neighborhood audits (street-by-street data  
20  
21 collection by researchers) may better capture food environment features that contribute to  
22  
23 healthy food access, but they are not feasible for large national samples across thousands of  
24  
25 census blocks groups. These intense audits are generally performed in smaller geographic areas,  
26  
27 and thus preclude broad comparisons across neighborhood type and sociodemographics. We  
28  
29 were unable to ascertain food sold at each establishment and relied on generalizations regarding  
30  
31 healthy (grocery/supermarket) versus unhealthy (convenience store, fast food restaurant) types of  
32  
33 establishments. In addition, this is a cross-sectional study and thus does not capture changes in  
34  
35 food environments over time. Further, due to lower participation of illegal immigrants in the  
36  
37 census, US census data may underestimate neighborhood minority population and poverty.  
38  
39 Finally, our 3 km network residential neighborhood buffer may not accurately reflect food  
40  
41 purchasing areas for different urban settings and sociodemographic subgroups; this is a topic  
42  
43 worthy for future study.  
44  
45  
46  
47  
48  
49

50  
51 Despite these limitations, our study is an essential step in understanding the allocation of  
52  
53 theoretically healthy and less healthy food resources across social and geographic space over the  
54  
55 entire US, and our findings can inform measurement and design in future individual-level and  
56  
57  
58  
59  
60



1  
2  
3 longitudinal studies. Our study benefits from the variation in neighborhoods of a large population  
4 that enables comparisons across multiple sociodemographic and urban strata within a single  
5 study. Further, our study capitalizes upon national data with roadway scaled measures of food  
6 availability within 3 km residential network buffers for each observation. In addition, we used  
7 more detailed measures of urbanicity derived both from US census and landcover data allowing a  
8 more refined urban/rural classification than the traditional urban/rural dichotomy. In sum, our  
9 study benefits from several innovations and depth of coverage that has been heretofore  
10 unaddressed in a large, geographically diverse study.  
11  
12  
13  
14  
15  
16  
17  
18  
19  
20  
21  
22  
23  
24

### 25 **Policy implications**

26  
27 Many state and national efforts focus on providing healthy eating options for poor inner-  
28 city neighborhoods, many with high minority populations. Strategies include providing produce  
29 carts in low income neighborhoods in New York City [34], directly or indirectly subsidizing  
30 supermarkets [35-38], banning fast-food restaurant construction in selected urban areas [39], as  
31 well as legislation considered at the national level [40]. Our results suggest that less urban areas  
32 might benefit from similar policies.  
33  
34  
35  
36  
37  
38  
39  
40  
41  
42

### 43 **Conclusion**

44  
45 Our findings suggest that common assumptions regarding income and race-ethnic  
46 subpopulation disparities in food resources may not be universally true across the spectrum of  
47 urbanicity. We observed an association between greater neighborhood poverty and minority  
48 population with greater availability of fast-food restaurants in urban areas. Conversely,  
49 disparities in grocery/supermarkets were primarily observed in low density urban areas. Our  
50  
51  
52  
53  
54  
55  
56  
57  
58  
59  
60

1  
2  
3 findings suggest that poverty and race may play distinct roles in how food resources are allocated  
4  
5 and that underlying social complexities should be further explored in dense urban, suburban, and  
6  
7 rural areas.  
8  
9

## 10 11 12 **ACKNOWLEDGEMENTS**

13  
14  
15 The authors would like to thank Brian Frizzelle, Marc Peterson, Chris Mankoff, James D.  
16  
17 Stewart, Phil Bardsley, and Diane Kaczor of the University of North Carolina, Carolina  
18  
19 Population Center (CPC) and the CPC Spatial Analysis Unit for creation of the environmental  
20  
21 variables. The authors also thank Ms. Frances Dancy for her helpful administrative assistance.  
22  
23  
24 There were no potential or real conflicts of financial or personal interest with the financial  
25  
26 sponsors of the scientific project.  
27  
28

29  
30 This work was funded by National Institutes of Health grant R01HD057194 and R01  
31  
32 HD041375, R01 HD39183, a cooperative agreement with the Centers for Disease Control and  
33  
34 Prevention (CDC SIP No. 5-00). The authors are also grateful to R24 HD050924 from the  
35  
36 Eunice Kennedy Shriver National Institute of Child Health and Human Development (NICHD)  
37  
38 for broad support of the authors, although no funding was provided by this grant. Analysis and  
39  
40 manuscript preparation was supported by the Interdisciplinary Obesity Training postdoctoral  
41  
42 fellowship (T32MH075854-04).  
43  
44  
45

46  
47 Data sharing: This research uses data from Add Health, a program project designed by J.  
48  
49 Richard Udry, Peter S. Bearman, and Kathleen Mullan Harris, and funded by a grant P01-  
50  
51 HD31921 from the Eunice Kennedy Shriver National Institute of Child Health and Human  
52  
53 Development, with cooperative funding from 17 other agencies. Special acknowledgment is due  
54  
55 Ronald R. Rindfuss and Barbara Entwisle for assistance in the original design. Persons interested  
56  
57  
58  
59  
60

1  
2  
3 in obtaining data files from Add Health should contact Add Health, CPC, 123 W. Franklin  
4  
5 Street, Chapel Hill, NC 27516-2524 ([addhealth@unc.edu](mailto:addhealth@unc.edu)). No direct support was received from  
6  
7  
8 grant P01-HD31921 for this analysis.  
9

10  
11 Contributorship:  
12  
13

14  
15 All authors significantly contributed to the  
16  
17

- 18  
19  
20  
21 1) conception and design, acquisition of data or analysis and interpretation of data  
22  
23  
24 2) drafting the article or revising it critically for important intellectual content.  
25  
26  
27 3) final approval of the version published  
28  
29  
30  
31  
32  
33  
34  
35  
36  
37  
38  
39  
40  
41  
42  
43  
44  
45  
46  
47  
48  
49  
50  
51  
52  
53  
54  
55  
56  
57  
58  
59  
60

Table 1. Urbanicity-specific<sup>a</sup> neighborhood demographics, National Longitudinal Study of Adolescent Health, Wave III (2001-2), n=13,995.

|                                                                    | Non-urban   | Low density urban | High density urban |
|--------------------------------------------------------------------|-------------|-------------------|--------------------|
| Count (census block groups)                                        | 1,530       | 4,132             | 1,935              |
| Count (Add Health respondents)                                     | 3,779       | 6,676             | 3,549              |
| % College educated or above <sup>b</sup> - mean (SD)               | 16.6 (0.8)  | 25.5 (1.1)        | 22.2 (1.8)         |
| Population density (persons/km <sup>2</sup> ) <sup>c</sup> - range |             |                   |                    |
| Low                                                                | 0.2-80.4    | 15.4-981.3        | 555.2-2651.2       |
| High                                                               | 80.7-2299.9 | 981.4-26514.7     | 2651.5-22952.4     |

<sup>a</sup> Non-urban: distance to Urbanized Area (UA) >0, low density urban: distance to UA=0 & % developed land cover, excluding water and ice (land developed) <=95%, high density urban: distance to UA=0 & % land developed >95%.

<sup>b</sup> Census block group

<sup>c</sup> Within 3km Euclidean buffer around individual residence

Table 2. Means and (SD) of food resources<sup>a</sup> (Count per 100 km secondary and local road within 3 km network buffer around each individual residence)<sup>b</sup>. National Longitudinal Study of Adolescent Health, Wave III (2001-2), n=13,995, by urbanicity<sup>c</sup>

| Neighborhood                             |                                                      |       |                     |                    |              |              |
|------------------------------------------|------------------------------------------------------|-------|---------------------|--------------------|--------------|--------------|
| Percent poverty <sup>d,e</sup> within 3k | Percent minority population <sup>d,f</sup> within 3k | N     | Grocery/supermarket | Convenience stores | Fast food    |              |
| Non-urban                                |                                                      |       |                     |                    |              |              |
| Low                                      | Low                                                  | 545   | 0.22 (0.08)         | 0.91 (0.42)        | 2.48 (0.47)  |              |
|                                          | Medium                                               | 954   | 0.14 (0.03)         | 0.34 (0.07)        | 2.04 (0.23)  |              |
|                                          | High                                                 | 1024  | 0.05 (0.02)         | 0.22 (0.05)        | 1.43 (0.24)  |              |
| High                                     | Low                                                  | 715   | 0.33 (0.20)         | 2.00 (1.21)        | 3.22 (0.53)  |              |
|                                          | Medium                                               | 306   | 0.08 (0.04)         | 0.17 (0.08)        | 5.03 (0.72)  |              |
|                                          | High                                                 | 232   | 0.12 (0.06)         | 0.27 (0.14)        | 1.68 (0.91)  |              |
|                                          |                                                      | Total | 3,779               | 0.15 (0.05)        | 0.62 (0.27)  | 2.33 (0.21)  |
| Low density urban                        |                                                      |       |                     |                    |              |              |
| Low                                      | Low                                                  | 1320  | 3.47 (0.39)         | 4.57 (0.66)        | 5.71 (0.39)  |              |
|                                          | Medium                                               | 1757  | 1.90 (0.17)         | 2.77 (0.19)        | 5.30 (0.21)  |              |
|                                          | High                                                 | 2078  | 0.84 (0.15)         | 1.55 (0.27)        | 4.32 (0.18)  |              |
| High                                     | Low                                                  | 910   | 3.81 (0.58)         | 4.20 (0.46)        | 6.48 (0.36)  |              |
|                                          | Medium                                               | 477   | 2.25 (0.47)         | 3.18 (0.43)        | 9.40 (0.50)  |              |
|                                          | High                                                 | 129   | 1.28 (0.38)         | 1.91 (0.45)        | 10.31 (1.24) |              |
|                                          |                                                      | Total | 6,676               | 2.06 (0.22)        | 2.86 (0.26)  | 5.58 (0.19)  |
| High density urban                       |                                                      |       |                     |                    |              |              |
| Low                                      | Low                                                  | 767   | 8.21 (2.96)         | 7.47 (0.81)        | 6.83 (1.33)  |              |
|                                          | Medium                                               | 786   | 8.06 (2.55)         | 9.74 (1.12)        | 7.32 (1.17)  |              |
|                                          | High                                                 | 870   | 7.19 (1.82)         | 11.31 (1.85)       | 6.71 (0.85)  |              |
| High                                     | Low                                                  | 418   | 15.97 (5.46)        | 10.08 (1.80)       | 9.70 (2.45)  |              |
|                                          | Medium                                               | 400   | 9.70 (4.22)         | 9.69 (1.92)        | 7.12 (2.13)  |              |
|                                          | High                                                 | 307   | 7.09 (1.46)         | 9.95 (0.65)        | 7.10 (1.20)  |              |
|                                          |                                                      | Total | 3,549               | 8.72 (2.31)        | 7.24 (1.08)  | 10.18 (1.14) |

<sup>a</sup> See Appendix A for SIC codes for grocery/supermarkets, convenience stores, and fast food

<sup>b</sup> Means and SD corrected for clustering and weighted for representation.

<sup>c</sup> Non-urban: distance to Urbanized Area (UA) >0, low density urban: distance to UA=0 & % developed land cover, excluding water and ice (land developed) <=95%, high density urban: distance to UA=0 & % land developed >95%.

<sup>d</sup> Census block group

<sup>e</sup> Greater than 20% of population below the federal poverty level

<sup>f</sup> Percent non-Hispanic White population. Non-urban (Low:0-74.7%, Medium: 74.8-96.3%, High: 96.4-100%), Low density urban (Low: 0-70.7%, Medium: 70.8-90.5% High: 90.6-100%) High density urban (Low: 0-31%, Medium: 31.1-63.7%, High: 63.8-100%)

Table 3. Associations between high neighborhood poverty<sup>a</sup> and urbanicity-specific minority composition<sup>b</sup> and high neighborhood and food resource<sup>c</sup> availability [beta coefficient (95% CI)]<sup>d</sup> National Longitudinal Study of Adolescent Health, Wave III (2001-2), n=13,995, by urbanicity<sup>e</sup>

| Food resource<br>(count per<br>100 km<br>secondary<br>and local road<br>within 3 km<br>network<br>buffer) | Neighborhood                                   |                                                                       | Non-urban                                         | Low density urban                                 | High density urban                                |
|-----------------------------------------------------------------------------------------------------------|------------------------------------------------|-----------------------------------------------------------------------|---------------------------------------------------|---------------------------------------------------|---------------------------------------------------|
|                                                                                                           | Percent<br>poverty <sup>a,f</sup><br>within 3k | Percent<br>minority<br>popula-<br>tion <sup>b,f</sup><br>within<br>3k | beta coefficient<br>( 95% Confidence<br>Interval) | beta coefficient<br>( 95% Confidence<br>Interval) | beta coefficient<br>( 95% Confidence<br>Interval) |
| Grocery/super<br>market                                                                                   | Low                                            | Low                                                                   | 0.0                                               | 0.0                                               | 0.0                                               |
|                                                                                                           |                                                | Medium                                                                | -0.09 (-0.23, 0.05)                               | -1.17 (-1.72, -0.63)*                             | -2.11 (-7.54, 3.31)                               |
|                                                                                                           |                                                | High                                                                  | -0.13 (-0.28, 0.01)                               | -1.76 (-2.39, -1.13)*                             | 1.70 (-2.38, 5.77)                                |
|                                                                                                           | High                                           | Low                                                                   | 0.09 (-0.21, 0.40)                                | 0.26 (-0.70, 1.21)                                | 8.05 (2.52, 13.57)†                               |
|                                                                                                           |                                                | Medium                                                                | -0.18 (-0.37, 0.00)                               | -1.35 (-2.36, -0.33)*                             | 4.96 (-1.74, 11.65)†                              |
|                                                                                                           |                                                | High                                                                  | 0.00 (-0.18, 0.18)†                               | -1.91 (-2.73, -1.09)*                             | -0.72 (-5.68, 4.24)*                              |
| Convenience<br>store                                                                                      | Low                                            | Low                                                                   | 0                                                 | 0                                                 | 0                                                 |
|                                                                                                           |                                                | Medium                                                                | -0.54 (-1.26, 0.17)                               | -1.38 (-2.44, -0.32)*                             | -0.53 (-3.07, 2.01)                               |
|                                                                                                           |                                                | High                                                                  | -0.51 (-1.20, 0.17)                               | -2.05 (-3.17, -0.93)*                             | 1.56 (-0.41, 3.53)                                |
|                                                                                                           | High                                           | Low                                                                   | 1.01 (-0.69, 2.71)                                | -0.43 (-1.69, 0.84)                               | 2.89 (0.64, 5.14)†                                |
|                                                                                                           |                                                | Medium                                                                | -0.86 (-1.76, 0.04)†                              | -1.58 (-3.06, -0.11)*                             | 2.19 (-0.92, 5.31)†                               |
|                                                                                                           |                                                | High                                                                  | -0.27 (-0.92, 0.39)                               | -2.38 (-3.62, -1.14)*                             | 0.64 (-1.61, 2.88)                                |
| Fast food                                                                                                 | Low                                            | Low                                                                   | 0                                                 | 0                                                 | 0                                                 |
|                                                                                                           |                                                | Medium                                                                | -0.68 (-1.37, 0.01)                               | -0.01 (-0.63, 0.61)                               | 0.39 (-1.77, 2.54)                                |
|                                                                                                           |                                                | High                                                                  | -0.47 (-1.07, 0.14)                               | -0.44 (-1.12, 0.24)                               | 4.36 (1.44, 7.28)*                                |
|                                                                                                           | High                                           | Low                                                                   | 0.44 (-0.34, 1.23)                                | 0.73 (-0.08, 1.53)                                | 4.03 (1.97, 6.09)†                                |
|                                                                                                           |                                                | Medium                                                                | 1.80 (0.75, 2.86)*†                               | 3.47 (2.31, 4.64)*†                               | 4.85 (2.13, 7.57)†                                |
|                                                                                                           |                                                | High                                                                  | 0.82 (-0.62, 2.26)                                | 4.87 (2.26, 7.48)*†                               | 1.56 (-1.39, 4.50)                                |

<sup>a</sup> Greater than 20% of population below the federal poverty level

<sup>b</sup> Percent non-Hispanic White population. Non-urban (Low:0-74.7%, Medium: 74.8-96.3%, High: 96.4-100%), Low density urban (Low: 0-70.7%, Medium: 70.8-90.5% High: 90.6-100%) High density urban (Low: 0-31%, Medium: 31.1-63.7%, High: 63.8-100%)

<sup>c</sup> See Appendix A for SIC codes for grocery/supermarkets, convenience stores, and fast food

<sup>d</sup> Linear regression models, controlling for percent college educate and population density

<sup>e</sup> Non-urban: distance to Urbanized Area (UA) >0, low density urban: distance to UA=0 & % developed land cover, excluding water and ice (land developed) <=95%, high density urban: distance to UA=0 & % land developed >95%.

<sup>f</sup> Census block group

\* Statistically different (alpha=0.05) than low minority population, within poverty status stratum

† Statistically different (alpha=0.05) than low poverty status, within minority population stratum

## REFERENCES

- 1  
2  
3  
4  
5  
6  
7  
8  
9  
10  
11  
12  
13  
14  
15  
16  
17  
18  
19  
20  
21  
22  
23  
24  
25  
26  
27  
28  
29  
30  
31  
32  
33  
34  
35  
36  
37  
38  
39  
40  
41  
42  
43  
44  
45  
46  
47  
48  
49  
50  
51  
52  
53  
54  
55  
56  
57  
58  
59  
60
1. Timperio A, Ball K, Roberts R, Campbell K, Andrianopoulos N, Crawford D. Children's fruit and vegetable intake: associations with the neighbourhood food environment. *Prev Med* 2008;**46**(4):331-5 doi: S0091-7435(07)00491-4 [pii]  
10.1016/j.ypmed.2007.11.011[published Online First: Epub Date].
  2. Boone-Heinonen J, Gordon-Larsen P, Kiefe CI, Shikany JM, Lewis CE, Popkin BM. Fast food restaurants and food stores: longitudinal associations with diet in young to middle-aged adults: the CARDIA study. *Arch Intern Med* 2011;**171**(13):1162-70 doi: 171/13/1162 [pii]  
10.1001/archinternmed.2011.283[published Online First: Epub Date].
  3. Richardson AS, Boone-Heinonen J, Popkin BM, Gordon-Larsen P. Neighborhood fast food restaurants and fast food consumption: a national study. *BMC Public Health* 2011;**11**:543 doi: 1471-2458-11-543 [pii]  
10.1186/1471-2458-11-543[published Online First: Epub Date].
  4. Zick CD, Smith KR, Fan JX, Brown BB, Yamada I, Kowaleski-Jones L. Running to the store? The relationship between neighborhood environments and the risk of obesity. *Soc Sci Med* 2009;**69**(10):1493-500 doi: S0277-9536(09)00570-X [pii]  
10.1016/j.socscimed.2009.08.032[published Online First: Epub Date].
  5. Beaulac J, Kristjansson E, Cummins S. A systematic review of food deserts, 1966-2007. *Prev Chronic Dis* 2009;**6**(3):A105 doi: A105 [pii][published Online First: Epub Date].

- 1  
2  
3  
4  
5  
6  
7  
8  
9  
10  
11  
12  
13  
14  
15  
16  
17  
18  
19  
20  
21  
22  
23  
24  
25  
26  
27  
28  
29  
30  
31  
32  
33  
34  
35  
36  
37  
38  
39  
40  
41  
42  
43  
44  
45  
46  
47  
48  
49  
50  
51  
52  
53  
54  
55  
56  
57  
58  
59  
60
6. Institute of Medicine and National Research Council. Workshop on the public health effects of food deserts: Workshop summary. In: Medicine Io, ed. Washington D.C.: National Academy, 2009.
  7. Larson NI, Story MT, Nelson MC. Neighborhood environments: disparities in access to healthy foods in the U.S. *Am J Prev Med* 2009;**36**(1):74-81 doi: S0749-3797(08)00838-6 [pii]  
10.1016/j.amepre.2008.09.025[published Online First: Epub Date]l.
  8. Walker RE, Keane CR, Burke JG. Disparities and access to healthy food in the United States: A review of food deserts literature. *Health Place* 2010;**16**(5):876-84 doi: S1353-8292(10)00058-4 [pii]  
10.1016/j.healthplace.2010.04.013[published Online First: Epub Date]l.
  9. Rose D, Bodor NJ, Swalm CM, Rice JC, Farley TA, Hutchinson PL. DESERTS IN NEW ORLEANS? ILLUSTRATIONS OF URBAN FOOD ACCESS AND IMPLICATIONS FOR POLICY. University of Michigan National Poverty Center/USDA Economic Research Service Research "Understanding the Economic Concepts and Characteristics of Food Access". New Orleans: Tulane University, 2009.
  10. USDA. Access to Affordable and Nutritious Food: Measuring and Understanding Food Deserts and Their Consequences. Report to Congress: Economic Research Service, 2009.
  11. Sharkey JR, Horel S. Neighborhood socioeconomic deprivation and minority composition are associated with better potential spatial access to the ground-truthed food environment in a large rural area. *J Nutr* 2008;**138**(3):620-7 doi: 138/3/620 [pii][published Online First: Epub Date]l.



- 1  
2  
3  
4  
5  
6  
7  
8  
9  
10  
11  
12  
13  
14  
15  
16  
17  
18  
19  
20  
21  
22  
23  
24  
25  
26  
27  
28  
29  
30  
31  
32  
33  
34  
35  
36  
37  
38  
39  
40  
41  
42  
43  
44  
45  
46  
47  
48  
49  
50  
51  
52  
53  
54  
55  
56  
57  
58  
59  
60
12. Sharkey JR, Horel S, Han D, Huber JC, Jr. Association between neighborhood need and spatial access to food stores and fast food restaurants in neighborhoods of colonias. *Int J Health Geogr* 2009;**8**:9 doi: 1476-072X-8-9 [pii]  
10.1186/1476-072X-8-9[published Online First: Epub Date].
13. Smith DM, Cummins S, Taylor M, et al. Neighbourhood food environment and area deprivation: spatial accessibility to grocery stores selling fresh fruit and vegetables in urban and rural settings. *Int J Epidemiol* 2010;**39**(1):277-84 doi: dyp221 [pii]  
10.1093/ije/dyp221[published Online First: Epub Date].
14. Oliver LN, Schuurman N, Hall AW. Comparing circular and network buffers to examine the influence of land use on walking for leisure and errands. *Int J Health Geogr* 2007;**6**:41 doi: 1476-072X-6-41 [pii]  
10.1186/1476-072X-6-41[published Online First: Epub Date].
15. Miller WC, Ford CA, Morris M, et al. Prevalence of chlamydial and gonococcal infections among young adults in the United States. *JAMA* 2004;**291**(18):2229-36 doi: 10.1001/jama.291.18.2229  
291/18/2229 [pii][published Online First: Epub Date].
16. Resnick MD, Bearman PS, Blum RW, et al. Protecting adolescents from harm. Findings from the National Longitudinal Study on Adolescent Health. *JAMA* 1997;**278**(10):823-32
17. Boone-Heinonen J, Evenson KR, Song Y, Gordon-Larsen P. Built and socioeconomic environments: patterning and associations with physical activity in U.S. adolescents. *Int J Behav Nutr Phys Act* 2010;**7**:45 doi: 1479-5868-7-45 [pii]  
10.1186/1479-5868-7-45[published Online First: Epub Date].

- 1  
2  
3 18. Boone-Heinonen J, Popkin BM, Song Y, Gordon-Larsen P. What neighborhood area  
4 captures built environment features related to adolescent physical activity? *Health Place*  
5 2010;**16**(6):1280-6 doi: S1353-8292(10)00090-0 [pii]  
6  
7  
8  
9  
10  
11 10.1016/j.healthplace.2010.06.015[published Online First: Epub Date].  
12  
13 19. Boone-Heinonen J, Gordon-Larsen P. What is the relevant neighborhood area for detecting  
14 built environment relationships with physical activity? submitted to *Health & Place* 2010  
15  
16  
17 20. Subramanian SV, Chen JT, Rehkopf DH, Waterman PD, Krieger N. Racial disparities in  
18 context: a multilevel analysis of neighborhood variations in poverty and excess mortality  
19 among black populations in Massachusetts. *Am J Public Health* 2005;**95**(2):260-5 doi:  
20 95/2/260 [pii]  
21  
22  
23 10.2105/AJPH.2003.034132[published Online First: Epub Date].  
24  
25  
26 21. U.S. Census Bureau. Statistical Brief- Poverty Areas. Secondary Statistical Brief- Poverty  
27 Areas 1995. <http://www.census.gov/population/socdemo/statbriefs/povarea.html>.  
28  
29  
30 22. FRAGSTATS: Spatial Pattern Analysis Program for Categorical Maps. [program], 2002.  
31  
32  
33 23. Clarke P. When can group level clustering be ignored? Multilevel models versus single-level  
34 models with sparse data. *J Epidemiol Community Health* 2008;**62**(8):752-8 doi: 62/8/752  
35 [pii]  
36  
37  
38 10.1136/jech.2007.060798[published Online First: Epub Date].  
39  
40  
41 24. Jago R, Baranowski T, Baranowski JC, Cullen KW, Thompson D. Distance to food stores &  
42 adolescent male fruit and vegetable consumption: mediation effects. *Int J Behav Nutr*  
43 *Phys Act* 2007;**4**:35 doi: 1479-5868-4-35 [pii]  
44  
45  
46 10.1186/1479-5868-4-35[published Online First: Epub Date].  
47  
48  
49  
50  
51  
52  
53  
54  
55  
56  
57  
58  
59  
60

- 1  
2  
3  
4  
5  
6  
7  
8  
9  
10  
11  
12  
13  
14  
15  
16  
17  
18  
19  
20  
21  
22  
23  
24  
25  
26  
27  
28  
29  
30  
31  
32  
33  
34  
35  
36  
37  
38  
39  
40  
41  
42  
43  
44  
45  
46  
47  
48  
49  
50  
51  
52  
53  
54  
55  
56  
57  
58  
59  
60
25. Morland K, Filomena S. Disparities in the availability of fruits and vegetables between racially segregated urban neighbourhoods. *Public Health Nutr* 2007;**10**(12):1481-9 doi: S1368980007000079 [pii]  
10.1017/S1368980007000079[published Online First: Epub Date].
26. Block JP, Scribner RA, DeSalvo KB. Fast food, race/ethnicity, and income: a geographic analysis. *Am J Prev Med* 2004;**27**(3):211-7 doi: 10.1016/j.amepre.2004.06.007  
S0749-3797(04)00139-4 [pii][published Online First: Epub Date].
27. Wang MC, Kim S, Gonzalez AA, MacLeod KE, Winkleby MA. Socioeconomic and food-related physical characteristics of the neighbourhood environment are associated with body mass index. *J Epidemiol Community Health* 2007;**61**(6):491-8 doi: 61/6/491 [pii]  
10.1136/jech.2006.051680[published Online First: Epub Date].
28. Zenk SN, Powell LM. US secondary schools and food outlets. *Health Place* 2008;**14**(2):336-46 doi: S1353-8292(07)00066-4 [pii]  
10.1016/j.healthplace.2007.08.003[published Online First: Epub Date].
29. Borradaile KE, Sherman S, Vander Veur SS, et al. Snacking in children: the role of urban corner stores. *Pediatrics* 2009;**124**(5):1293-8 doi: peds.2009-0964 [pii]  
10.1542/peds.2009-0964[published Online First: Epub Date].
30. Lucan SC, Karpyn A, Sherman S. Storing empty calories and chronic disease risk: snack-food products, nutritive content, and manufacturers in Philadelphia corner stores. *J Urban Health*; **87**(3):394-409 doi: 10.1007/s11524-010-9453-5[published Online First: Epub Date].

- 1  
2  
3  
4  
5  
6  
7  
8  
9  
10  
11  
12  
13  
14  
15  
16  
17  
18  
19  
20  
21  
22  
23  
24  
25  
26  
27  
28  
29  
30  
31  
32  
33  
34  
35  
36  
37  
38  
39  
40  
41  
42  
43  
44  
45  
46  
47  
48  
49  
50  
51  
52  
53  
54  
55  
56  
57  
58  
59  
60
31. The Brookings Institution Metropolitan Policy Program. State of Metropolitan America: on the front lines of demographic transformation. In: The Brookings Institution Press, ed. Washington DC: The Brookings Institution, 2010.
32. Lovasi GS, Hutson MA, Guerra M, Neckerman KM. Built environments and obesity in disadvantaged populations. *Epidemiol Rev* 2009;**31**:7-20 doi: mxp005 [pii] 10.1093/epirev/mxp005[published Online First: Epub Date]l.
33. Raja S, Ma C, Yadav P. Beyond Food Deserts: Measuring and Mapping Racial Disparities in Neighborhood Food Environments. *Journal of Planning Education and Research* 2008;**27**:469-82
34. NYC Department of Health and Mental Hygiene. NYC Green Cart. Secondary NYC Green Cart 2008. [http://www.nyc.gov/html/doh/html/cdp/cdp\\_pan\\_green\\_carts.shtml](http://www.nyc.gov/html/doh/html/cdp/cdp_pan_green_carts.shtml).
35. The Reinvestment Fund. Commercial Real Estate: Supermarkets. Secondary Commercial Real Estate: Supermarkets 2010. <http://www.trfund.com/financing/realestate/supermarkets.html>.
36. Lombino D, Patterson J. New York City Industrial Development Agency Approves Incentives for First Two Supermarkets Under the Fresh Program. Secondary New York City Industrial Development Agency Approves Incentives for First Two Supermarkets Under the Fresh Program 2010. <http://www.nycedc.com/PressRoom/PressReleases/Pages/IDAApprovesIncentivesforSupermarkets.aspx>.
37. Stephens C. State of Louisiana Approves \$7 Million for Fresh Food Initiative in New Orleans. Secondary State of Louisiana Approves \$7 Million for Fresh Food Initiative in

1  
2  
3  
4  
5  
6  
7  
8  
9  
10  
11  
12  
13  
14  
15  
16  
17  
18  
19  
20  
21  
22  
23  
24  
25  
26  
27  
28  
29  
30  
31  
32  
33  
34  
35  
36  
37  
38  
39  
40  
41  
42  
43  
44  
45  
46  
47  
48  
49  
50  
51  
52  
53  
54  
55  
56  
57  
58  
59  
60

New Orleans 2009.

<http://www.lra.louisiana.gov/index.cfm?md=newsroom&tmp=detail&articleID=582>.

38. The Food Trust. Pennsylvania Fresh Food Financing Initiative. Secondary Pennsylvania Fresh Food Financing Initiative 2004.

<http://www.thefoodtrust.org/php/programs/fffi.php>.

39. Los Angeles City Clerk. FAST FOOD RESTAURANTS / INTERIM CONTROL ORDINANCE / WEST-ADAMS-BALDWIN HILLS-LEIMERT, SOUTH AND SOUTHEAST LOS ANGELES. Secondary FAST FOOD RESTAURANTS / INTERIM CONTROL ORDINANCE / WEST-ADAMS-BALDWIN HILLS-LEIMERT, SOUTH AND SOUTHEAST LOS ANGELES 2008.

<http://cityclerk.lacity.org/lacityclerkconnect/index.cfm?fa=ccfi.viewrecord&cfnumber=07-1658&CFID=16806974&CFTOKEN=73b760e131fb720-4A7614CB-C1C7-C84F-F1E8474351348CDC&jsessionid=f030cb1129cc179c6eed6440245a58561e87>.

40. letsmove.gov. Accessing Healthy & Affordable Food. Secondary Accessing Healthy & Affordable Food 2010. <http://letsmove.gov/accessing/index.html>.

1  
2  
3  
4  
5  
6  
7  
8  
9  
10  
11  
12  
13  
14  
15  
16  
17  
18  
19  
20  
21  
22  
23  
24  
25  
26  
27  
28  
29  
30  
31  
32  
33  
34  
35  
36  
37  
38  
39  
40  
41  
42  
43  
44  
45  
46  
47  
48  
49

**Figure 1.** Predicted neighborhood food resource availability (count per 10,000 population) for various neighborhood poverty<sup>a</sup> and minority population<sup>b</sup> levels<sup>c</sup>

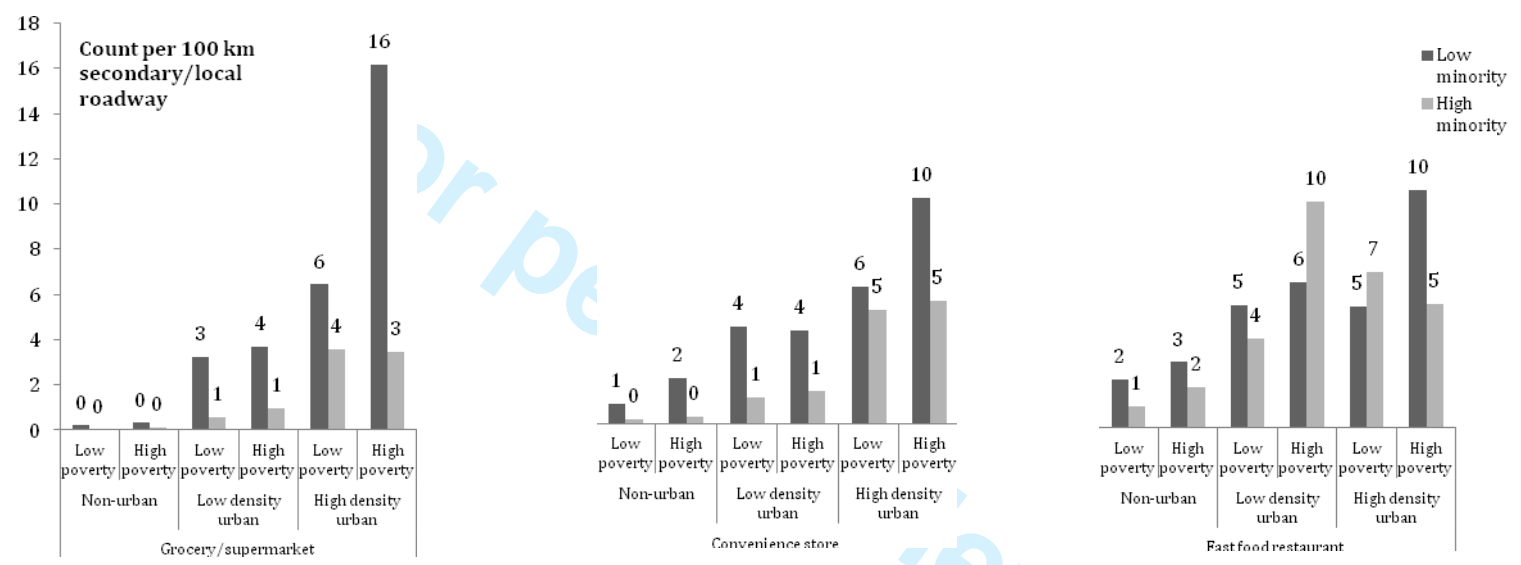

<sup>a</sup> Greater than 20% of population below the federal poverty level

<sup>b</sup> Percent non-Hispanic White population. Non-urban (Low:0-74.7%, Medium: 74.8-96.3%, High: 96.4-100%), Low density urban (Low: 0-70.7%, Medium: 70.8-90.5% High: 90.6-100%) High density urban (Low: 0-31%, Medium: 31.1-63.7%, High: 63.8-10%)

<sup>c</sup> National Longitudinal Study of Adolescent Health Wave III (young adulthood; 2001-02), corrected for clustering and weighted for representation. Estimated from urbanicity-stratified regression modeling food resource availability (within 3k network buffer) as a function of neighborhood poverty status (>20% population below federal poverty level, compared to ≤20% of population below federal poverty level), with neighborhood poverty\*neighborhood minority interactions. For simplicity, predictions for medium neighborhood minority population are not reported;

Appendix A. Detailed food resource definitions based on 4- and 8-digit Standard Industrial Classification (SIC) codes

| Food Resource Type          | SIC subgroup                    | SIC                         | Description                                |                                                              |
|-----------------------------|---------------------------------|-----------------------------|--------------------------------------------|--------------------------------------------------------------|
| Fast food chain & non-chain | Fast food chain (5812)          | 58120307                    | Fast-food restaurant, chain                |                                                              |
|                             |                                 | 58120601                    | Pizzeria, chain                            |                                                              |
|                             | Fast food non-chain (5812)      | 58120300                    | Fast food restaurants and stands           |                                                              |
|                             |                                 | 58120301                    | Box lunch stand                            |                                                              |
|                             |                                 | 58120302                    | Carry-out only (except pizza) restaurant   |                                                              |
|                             |                                 | 58120303                    | Chili stand                                |                                                              |
|                             |                                 | 58120304                    | Coffee shop                                |                                                              |
|                             |                                 | 58120305                    | Delicatessen (eating places)               |                                                              |
|                             |                                 | 58120306                    | Drive-in restaurant                        |                                                              |
|                             |                                 | 58120308                    | Fast-food restaurant, independent          |                                                              |
|                             |                                 | 58120309                    | Food bars                                  |                                                              |
|                             |                                 | 58120310                    | Grills (eating places)                     |                                                              |
|                             |                                 | 58120311                    | Hamburger stand                            |                                                              |
|                             |                                 | 58120312                    | Hot dog stand                              |                                                              |
|                             |                                 | 58120313                    | Sandwiches and submarines shop             |                                                              |
|                             |                                 | 58120314                    | Snack bar                                  |                                                              |
| 58120315                    | Snack shop                      |                             |                                            |                                                              |
|                             | 58120600                        | Pizza restaurants           |                                            |                                                              |
|                             | 58120602                        | Pizzeria, independent       |                                            |                                                              |
| Grocery/Supermarkets        | Grocery stores chain (5411)     | 54119904                    | Grocery stores, chain                      |                                                              |
|                             |                                 | 54119905                    | Grocery stores, independent                |                                                              |
|                             | Grocery stores non-chain (5411) | 54110000                    | Grocery stores                             |                                                              |
|                             |                                 | 54119900                    | Grocery stores, nec                        |                                                              |
|                             |                                 | 54119903                    | Frozen food and freezer plans, except meat |                                                              |
|                             | Grocery stores other (5411)     | 53999903                    | Country general stores                     |                                                              |
|                             |                                 | Supermarkets smaller (5411) | 54110101                                   | Supermarkets, chain                                          |
|                             |                                 |                             | 54110103                                   | Supermarkets, greater than 100,000 square feet (hypermarket) |
|                             |                                 | Supermarkets larger         | 54110102                                   | Supermarkets,                                                |

|                    |                    |          |                            |
|--------------------|--------------------|----------|----------------------------|
|                    | (5411)             |          | independent                |
|                    |                    |          | Supermarkets, 55,000 -     |
|                    |                    |          | 65,000 square feet         |
|                    |                    | 54110104 | (superstore)               |
|                    |                    |          | Supermarkets, 66,000 -     |
|                    |                    | 54110105 | 99,000 square feet         |
|                    | Supermarkets other |          |                            |
|                    | (5411)             | 54110100 | Supermarkets               |
|                    | Convenience Stores |          |                            |
| Convenience stores | (5411/5331/5541)   | 53310000 | Variety stores             |
|                    |                    | 54110200 | Convenience stores         |
|                    |                    |          | Convenience stores,        |
|                    |                    | 54110201 | chain                      |
|                    |                    |          | Convenience stores,        |
|                    |                    | 54110202 | independent                |
|                    |                    | 55410000 | Gasoline service stations  |
|                    |                    |          | Gasoline service stations, |
|                    |                    | 55419900 | nec                        |
|                    |                    | 55419901 | Filling stations, gasoline |



Appendix B. Means and (SD) of alternate measures of food resources availability<sup>a,b</sup>, National Longitudinal Study of Adolescent Health, Wave III (2001-2), n=13,995, by urbanicity<sup>c</sup>

| Neighborhood                                         |                                                                 | Count per 10,000 population- within 3 km<br>Euclidean buffer |                             |                       |              | Distance to nearest outlet (km)- within 8 km<br>Euclidean buffer |                       |             |
|------------------------------------------------------|-----------------------------------------------------------------|--------------------------------------------------------------|-----------------------------|-----------------------|--------------|------------------------------------------------------------------|-----------------------|-------------|
| Percent<br>poverty<br><sup>d,f</sup><br>within<br>3k | Percent<br>minority<br>populatio<br><sup>d,e</sup><br>within 3k | N                                                            | Grocery/<br>supermarke<br>t | Convenience<br>stores | Fast food    | Grocery/<br>supermarket                                          | Convenience<br>stores | Fast food   |
| Non-urban                                            |                                                                 |                                                              |                             |                       |              | Non-urban                                                        |                       |             |
| Low                                                  | Low                                                             | 545                                                          | 0.50 (0.17)                 | 1.75 (0.77)           | 6.38 (1.16)  | 3.00 (0.56)                                                      | 2.49 (0.50)           | 2.09 (0.23) |
|                                                      | Medium                                                          | 954                                                          | 0.55 (0.13)                 | 1.17 (0.27)           | 5.51 (0.48)  | 3.05 (0.20)                                                      | 3.25 (0.19)           | 2.62 (0.16) |
|                                                      | High                                                            | 1024                                                         | 0.16 (0.06)                 | 0.94 (0.24)           | 5.00 (0.53)  | 3.25 (0.43)                                                      | 3.71 (0.42)           | 2.73 (0.17) |
| High                                                 | Low                                                             | 715                                                          | 0.58 (0.34)                 | 3.52 (2.10)           | 7.98 (0.65)  | 1.46 (0.11)                                                      | 2.56 (0.88)           | 1.94 (0.26) |
|                                                      | Medium                                                          | 306                                                          | 0.20 (0.10)                 | 0.38 (0.19)           | 9.67 (0.84)  | 1.82 (0.60)                                                      | 2.50 (0.60)           | 1.48 (0.29) |
|                                                      | High                                                            | 232                                                          | 0.42 (0.10)                 | 0.87 (0.20)           | 4.60 (0.93)  | 1.61 (0.65)                                                      | 4.47 (0.80)           | 3.92 (0.58) |
| Total                                                |                                                                 | 3,779                                                        | 0.39 (0.09)                 | 1.46 (0.48)           | 6.16 (0.34)  | 2.56 (0.29)                                                      | 3.17 (0.34)           | 2.43 (0.12) |
| Low density urban                                    |                                                                 |                                                              |                             |                       |              | Low density urban                                                |                       |             |
| Low                                                  | Low                                                             | 1320                                                         | 2.73 (0.28)                 | 3.78 (0.27)           | 5.48 (0.25)  | 1.21 (0.13)                                                      | 1.12 (0.12)           | 0.80 (0.05) |
|                                                      | Medium                                                          | 1757                                                         | 1.89 (0.15)                 | 3.06 (0.20)           | 6.32 (0.19)  | 1.80 (0.17)                                                      | 1.58 (0.11)           | 0.91 (0.03) |
|                                                      | High                                                            | 2078                                                         | 0.99 (0.17)                 | 1.99 (0.34)           | 6.44 (0.19)  | 2.53 (0.32)                                                      | 2.59 (0.32)           | 1.08 (0.05) |
| High                                                 | Low                                                             | 910                                                          | 2.59 (0.28)                 | 3.50 (0.32)           | 5.97 (0.29)  | 1.14 (0.16)                                                      | 1.01 (0.10)           | 0.73 (0.05) |
|                                                      | Medium                                                          | 477                                                          | 1.73 (0.22)                 | 2.72 (0.29)           | 9.08 (0.95)  | 1.13 (0.20)                                                      | 1.28 (0.22)           | 0.53 (0.04) |
|                                                      | High                                                            | 129                                                          | 1.23 (0.32)                 | 1.71 (0.37)           | 11.52 (1.94) | 1.54 (0.44)                                                      | 1.41 (0.35)           | 0.56 (0.07) |
| Total                                                |                                                                 | 6,676                                                        | 0.39 (0.09)                 | 2.83 (0.21)           | 6.16 (0.34)  | 2.56 (0.29)                                                      | 3.17 (0.34)           | 2.43 (0.12) |
| High density urban                                   |                                                                 |                                                              |                             |                       |              | High density urban                                               |                       |             |
| Low                                                  | Low                                                             | 767                                                          | 3.00 (0.29)                 | 3.43 (0.29)           | 4.28 (0.42)  | 0.83 (0.24)                                                      | 0.56 (0.04)           | 0.60 (0.06) |
|                                                      | Medium                                                          | 786                                                          | 3.11 (0.34)                 | 3.60 (0.26)           | 4.98 (0.22)  | 0.87 (0.16)                                                      | 0.62 (0.06)           | 0.48 (0.04) |
|                                                      | High                                                            | 870                                                          | 2.74 (0.26)                 | 4.29 (0.41)           | 6.44 (0.18)  | 1.18 (0.24)                                                      | 0.81 (0.14)           | 0.50 (0.02) |
| High                                                 | Low                                                             | 418                                                          | 3.85 (0.63)                 | 3.32 (0.43)           | 4.72 (0.36)  | 0.94 (0.20)                                                      | 0.87 (0.18)           | 0.54 (0.06) |
|                                                      | Medium                                                          | 400                                                          | 3.30 (0.83)                 | 3.30 (0.66)           | 5.17 (0.45)  | 1.19 (0.42)                                                      | 0.94 (0.15)           | 0.57 (0.06) |
|                                                      | High                                                            | 307                                                          | 3.42 (0.59)                 | 4.17 (0.53)           | 6.43 (0.51)  | 0.93 (0.28)                                                      | 0.66 (0.11)           | 0.43 (0.03) |
| Total                                                |                                                                 | 3,549                                                        | 3.10 (0.34)                 | 3.84 (0.31)           | 5.64 (0.21)  | 1.04 (0.17)                                                      | 0.76 (0.09)           | 0.51 (0.03) |

<sup>a</sup> See Appendix A for SIC codes for grocery/supermarkets, convenience stores, and fast food

<sup>b</sup> Means and SD corrected for clustering and weighted for representation.

<sup>c</sup> Non-urban: distance to Urbanized Area (UA) >0, low density urban: distance to UA=0 & % developed land cover, excluding water and ice (land developed) <=95%, high density urban: distance to UA=0 & % land developed >95%.

<sup>d</sup> Census block group

<sup>e</sup> Greater than 20% of population below the federal poverty level

<sup>f</sup> Percent non-Hispanic White population. Non-urban (Low:0-74.7%, Medium: 74.8-96.3%, High: 96.4-100%), Low density urban (Low: 0-70.7%, Medium: 70.8-90.5% High: 90.6-100%) High density urban (Low: 0-31%, Medium: 31.1-63.7%, High: 63.8-100%)

Appendix C. Associations between urbanicity-specific neighborhood minority composition<sup>a</sup> and high neighborhood poverty<sup>b</sup> and alternate measures<sup>c</sup> of availability [beta coefficient (95% CI)]<sup>d,e</sup> National Longitudinal Study of Adolescent Health, Wave III (2001-2), n=13,995, by urbanicity<sup>f</sup>

| Neighborhood                                                                                                            |                                    |                      |                      |                     |
|-------------------------------------------------------------------------------------------------------------------------|------------------------------------|----------------------|----------------------|---------------------|
| Poverty status <sup>a,g</sup>                                                                                           | Minority population <sup>b,g</sup> | Non-urban            | Low density urban    | High density urban  |
| Grocery/supermarket density (count per 10,000 population) within 3 km Euclidean buffer around each individual residence |                                    |                      |                      |                     |
| Low                                                                                                                     | Low                                | 0.0                  | 0.0                  | 0.0                 |
|                                                                                                                         | Medium                             | -0.04 (-0.40, 0.31)  | -0.92 (-1.40, -0.44) | -0.03 (-0.61, 0.55) |
|                                                                                                                         | High                               | -0.35 (-0.69, -0.02) | -1.76 (-2.35, -1.18) | -0.51 (-1.04, 0.02) |
| High                                                                                                                    | Low                                | 0.08 (-0.49, 0.66)   | -0.03 (-0.55, 0.48)  | 1.11 (0.04, 2.18)   |
|                                                                                                                         | Medium                             | -0.38 (-0.77, 0.01)  | -1.14 (-1.78, -0.50) | 0.40 (-0.94, 1.74)  |
|                                                                                                                         | High                               | -0.01 (-0.42, 0.40)  | -1.57 (-2.40, -0.74) | 0.17 (-1.21, 1.55)  |
| Distance to nearest grocery/supermarket (km) within 8 km Euclidean buffer around each individual residence              |                                    |                      |                      |                     |
| Low                                                                                                                     | Low                                | 0.0                  | 0.0                  | 0.0                 |
|                                                                                                                         | Medium                             | -0.24 (-1.22, 0.74)  | 0.52 (0.24, 0.81)    | 0.18 (-0.11, 0.47)  |
|                                                                                                                         | High                               | -0.16 (-1.45, 1.12)  | 1.09 (0.46, 1.71)    | 0.20 (-0.50, 0.89)  |
| High                                                                                                                    | Low                                | -1.43 (-2.47, -0.39) | -0.08 (-0.36, 0.20)  | 0.08 (-0.33, 0.48)  |
|                                                                                                                         | Medium                             | -0.82 (-2.50, 0.85)  | 0.26 (-0.17, 0.69)   | 0.26 (-0.28, 0.79)  |
|                                                                                                                         | High                               | -1.67 (-3.39, 0.05)  | 0.66 (0.03, 1.29)    | 0.12 (-0.52, 0.77)  |
| Convenience store density (count per 10,000 population) within 3 km Euclidean buffer around each individual residence   |                                    |                      |                      |                     |
| Low                                                                                                                     | Low                                | 0.0                  | 0.0                  | 0.0                 |
|                                                                                                                         | Medium                             | -0.70 (-2.22, 0.83)  | -0.86 (-1.36, -0.35) | 0.18 (-0.47, 0.84)  |
|                                                                                                                         | High                               | -0.84 (-2.43, 0.75)  | -1.84 (-2.58, -1.10) | 0.87 (-0.16, 1.89)  |
| High                                                                                                                    | Low                                | 1.77 (-1.33, 4.87)   | -0.09 (-0.65, 0.46)  | -0.12 (-0.95, 0.71) |
|                                                                                                                         | Medium                             | -1.48 (-3.06, 0.10)  | -1.30 (-2.06, -0.55) | -0.13 (-1.32, 1.06) |
|                                                                                                                         | High                               | -0.79 (-2.39, 0.81)  | -2.19 (-3.02, -1.36) | 0.76 (-0.44, 1.95)  |
| Distance to nearest convenience store (km) within 8 km Euclidean buffer around each individual residence                |                                    |                      |                      |                     |
| Low                                                                                                                     | Low                                | 0.0                  | 0.0                  | 0.0                 |
|                                                                                                                         | Medium                             | 0.34 (-0.35, 1.03)   | 0.35 (0.11, 0.60)    | 0.11 (-0.02, 0.24)  |
|                                                                                                                         | High                               | 0.27 (-0.67, 1.21)   | 1.12 (0.61, 1.63)    | 0.16 (-0.13, 0.45)  |
| High                                                                                                                    | Low                                | 0.33 (-1.01, 1.67)   | -0.12 (-0.32, 0.08)  | 0.32 (0.05, 0.59)   |
|                                                                                                                         | Medium                             | -0.04 (-1.22, 1.15)  | 0.49 (0.02, 0.95)    | 0.30 (0.04, 0.55)   |
|                                                                                                                         | High                               | 1.19 (-0.27, 2.64)   | 0.61 (0.17, 1.06)    | 0.08 (-0.13, 0.30)  |
| Fast food density (count per 10,000 population) within 3 km Euclidean buffer around each individual residence           |                                    |                      |                      |                     |
| Low                                                                                                                     | Low                                | 0.0                  | 0.0                  | 0.0                 |
|                                                                                                                         | Medium                             | -1.59 (-4.05, 0.87)  | 0.83 (0.28, 1.37)    | 0.56 (-0.25, 1.37)  |
|                                                                                                                         | High                               | -1.52 (-3.93, 0.88)  | 0.96 (0.33, 1.59)    | 1.91 (1.03, 2.79)   |
| High                                                                                                                    | Low                                | 1.62 (-0.61, 3.84)   | 0.51 (-0.09, 1.10)   | 0.71 (-0.21, 1.63)  |
|                                                                                                                         | Medium                             | 2.67 (-0.08, 5.41)   | 3.59 (1.57, 5.60)    | 0.99 (-0.17, 2.16)  |
|                                                                                                                         | High                               | -1.22 (-3.83, 1.40)  | 6.04 (2.11, 9.97)    | 1.89 (0.62, 3.17)   |

Distance to nearest fast food restaurant (km) within 8 km Euclidean buffer around each individual residence

|      |        |                     |                      |                      |
|------|--------|---------------------|----------------------|----------------------|
| Low  | Low    | 0.0                 | 0.0                  | 0.0                  |
|      | Medium | 0.32 (-0.06, 0.71)  | 0.03 (-0.06, 0.12)   | -0.08 (-0.18, 0.02)  |
|      | High   | 0.07 (-0.40, 0.54)  | 0.10 (0.00, 0.21)    | -0.14 (-0.24, -0.04) |
| High | Low    | -0.20 (-0.49, 0.08) | -0.05 (-0.16, 0.05)  | -0.07 (-0.14, 0.00)  |
|      | Medium | -0.44 (-0.89, 0.01) | -0.24 (-0.36, -0.13) | -0.09 (-0.22, 0.05)  |
|      | High   | 0.51 (-0.33, 1.34)  | -0.30 (-0.46, -0.13) | -0.17 (-0.28, -0.07) |

<sup>a</sup> Greater than 20% of population below the federal poverty level

<sup>b</sup> Percent non-Hispanic White population. Non-urban (Low:0-74.7%, Medium: 74.8-96.3%, High: 96.4-100%), Low density urban (Low: 0-70.7%, Medium: 70.8-90.5% High: 90.6-100%) High density urban (Low: 0-31%, Medium: 31.1-63.7%, High: 63.8-10%)

<sup>c</sup> See Appendix A for SIC codes for grocery/supermarkets, convenience stores, and fast food

<sup>d</sup> Linear regression models, controlling for percent college educate and population density (except model of count per population measure)

<sup>e</sup> Dashes represent un-estimated associations; 1) measure within network 8km in low and high-density urban areas 2) measure within network 1km in non-urban areas.

<sup>f</sup> Non-urban: distance to Urbanized Area (UA) >0, low density urban: distance to UA=0 & % developed land cover, excluding water and ice (land developed) <=95%, high density urban: distance to UA=0 & % land developed >95%.

<sup>g</sup> Census block group

**STROBE 2007 (v4) checklist of items to be included in reports of observational studies in epidemiology\***  
**Checklist for cohort, case-control, and cross-sectional studies (combined)**

| Section/Topic             | Item # | Recommendation                                                                                                                                                                                                                                                                                                                                                                                                                                                         | Reported on page # |
|---------------------------|--------|------------------------------------------------------------------------------------------------------------------------------------------------------------------------------------------------------------------------------------------------------------------------------------------------------------------------------------------------------------------------------------------------------------------------------------------------------------------------|--------------------|
| Title and abstract        | 1      | (a) Indicate the study's design with a commonly used term in the title or the abstract                                                                                                                                                                                                                                                                                                                                                                                 | 1                  |
|                           |        | (b) Provide in the abstract an informative and balanced summary of what was done and what was found                                                                                                                                                                                                                                                                                                                                                                    | 4                  |
| <b>Introduction</b>       |        |                                                                                                                                                                                                                                                                                                                                                                                                                                                                        |                    |
| Background/rationale      | 2      | Explain the scientific background and rationale for the investigation being reported                                                                                                                                                                                                                                                                                                                                                                                   | 6-7                |
| Objectives                | 3      | State specific objectives, including any pre-specified hypotheses                                                                                                                                                                                                                                                                                                                                                                                                      | 7                  |
| <b>Methods</b>            |        |                                                                                                                                                                                                                                                                                                                                                                                                                                                                        |                    |
| Study design              | 4      | Present key elements of study design early in the paper                                                                                                                                                                                                                                                                                                                                                                                                                | 8                  |
| Setting                   | 5      | Describe the setting, locations, and relevant dates, including periods of recruitment, exposure, follow-up, and data collection                                                                                                                                                                                                                                                                                                                                        | 8                  |
| Participants              | 6      | (a) <i>Cohort study</i> —Give the eligibility criteria, and the sources and methods of selection of participants. Describe methods of follow-up<br><i>Case-control study</i> —Give the eligibility criteria, and the sources and methods of case ascertainment and control selection. Give the rationale for the choice of cases and controls<br><i>Cross-sectional study</i> —Give the eligibility criteria, and the sources and methods of selection of participants | 8                  |
|                           |        | (b) <i>Cohort study</i> —For matched studies, give matching criteria and number of exposed and unexposed<br><i>Case-control study</i> —For matched studies, give matching criteria and the number of controls per case                                                                                                                                                                                                                                                 |                    |
| Variables                 | 7      | Clearly define all outcomes, exposures, predictors, potential confounders, and effect modifiers. Give diagnostic criteria, if applicable                                                                                                                                                                                                                                                                                                                               | 9-10               |
| Data sources/ measurement | 8*     | For each variable of interest, give sources of data and details of methods of assessment (measurement). Describe comparability of assessment methods if there is more than one group                                                                                                                                                                                                                                                                                   | 9-10               |
| Bias                      | 9      | Describe any efforts to address potential sources of bias                                                                                                                                                                                                                                                                                                                                                                                                              | 11, 12             |
| Study size                | 10     | Explain how the study size was arrived at                                                                                                                                                                                                                                                                                                                                                                                                                              | 8                  |
| Quantitative variables    | 11     | Explain how quantitative variables were handled in the analyses. If applicable, describe which groupings were chosen and why                                                                                                                                                                                                                                                                                                                                           | 9-10               |
| Statistical methods       | 12     | (a) Describe all statistical methods, including those used to control for confounding                                                                                                                                                                                                                                                                                                                                                                                  | 11                 |
|                           |        | (b) Describe any methods used to examine subgroups and interactions                                                                                                                                                                                                                                                                                                                                                                                                    | 11                 |
|                           |        | (c) Explain how missing data were addressed                                                                                                                                                                                                                                                                                                                                                                                                                            | 8                  |
|                           |        | (d) <i>Cohort study</i> —If applicable, explain how loss to follow-up was addressed<br><i>Case-control study</i> —If applicable, explain how matching of cases and controls was addressed                                                                                                                                                                                                                                                                              | 8                  |

|                          |     |                                                                                                                                                                                                              |                |
|--------------------------|-----|--------------------------------------------------------------------------------------------------------------------------------------------------------------------------------------------------------------|----------------|
|                          |     | <i>Cross-sectional study</i> —If applicable, describe analytical methods taking account of sampling strategy                                                                                                 |                |
|                          |     | (e) Describe any sensitivity analyses                                                                                                                                                                        | 12             |
| <b>Results</b>           |     |                                                                                                                                                                                                              |                |
| Participants             | 13* | (a) Report numbers of individuals at each stage of study—eg numbers potentially eligible, examined for eligibility, confirmed eligible, included in the study, completing follow-up, and analysed            | 19             |
|                          |     | (b) Give reasons for non-participation at each stage                                                                                                                                                         |                |
|                          |     | (c) Consider use of a flow diagram                                                                                                                                                                           |                |
| Descriptive data         | 14* | (a) Give characteristics of study participants (eg demographic, clinical, social) and information on exposures and potential confounders                                                                     | 20             |
|                          |     | (b) Indicate number of participants with missing data for each variable of interest                                                                                                                          |                |
|                          |     | (c) <i>Cohort study</i> —Summarise follow-up time (eg, average and total amount)                                                                                                                             |                |
| Outcome data             | 15* | <i>Cohort study</i> —Report numbers of outcome events or summary measures over time                                                                                                                          |                |
|                          |     | <i>Case-control study</i> —Report numbers in each exposure category, or summary measures of exposure                                                                                                         |                |
|                          |     | <i>Cross-sectional study</i> —Report numbers of outcome events or summary measures                                                                                                                           | 20             |
| Main results             | 16  | (a) Give unadjusted estimates and, if applicable, confounder-adjusted estimates and their precision (eg, 95% confidence interval). Make clear which confounders were adjusted for and why they were included | 21             |
|                          |     | (b) Report category boundaries when continuous variables were categorized                                                                                                                                    |                |
|                          |     | (c) If relevant, consider translating estimates of relative risk into absolute risk for a meaningful time period                                                                                             |                |
| Other analyses           | 17  | Report other analyses done—eg analyses of subgroups and interactions, and sensitivity analyses                                                                                                               | Appendices B-C |
| <b>Discussion</b>        |     |                                                                                                                                                                                                              |                |
| Key results              | 18  | Summarise key results with reference to study objectives                                                                                                                                                     | 13-14          |
| Limitations              | 19  | Discuss limitations of the study, taking into account sources of potential bias or imprecision. Discuss both direction and magnitude of any potential bias                                                   | 15-16          |
| Interpretation           | 20  | Give a cautious overall interpretation of results considering objectives, limitations, multiplicity of analyses, results from similar studies, and other relevant evidence                                   | 16-17          |
| Generalisability         | 21  | Discuss the generalisability (external validity) of the study results                                                                                                                                        | 17             |
| <b>Other information</b> |     |                                                                                                                                                                                                              |                |
| Funding                  | 22  | Give the source of funding and the role of the funders for the present study and, if applicable, for the original study on which the present article is based                                                | 18             |

\*Give information separately for cases and controls in case-control studies and, if applicable, for exposed and unexposed groups in cohort and cross-sectional studies.

**Note:** An Explanation and Elaboration article discusses each checklist item and gives methodological background and published examples of transparent reporting. The STROBE checklist is best used in conjunction with this article (freely available on the Web sites of PLoS Medicine at <http://www.plosmedicine.org/>, Annals of Internal Medicine at <http://www.annals.org/>, and Epidemiology at <http://www.epidem.com/>). Information on the STROBE Initiative is available at [www.strobe-statement.org](http://www.strobe-statement.org).

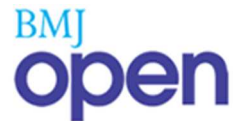

**Are neighborhood food resources distributed inequitably by income and race in the United States? Epidemiologic findings across the urban spectrum**

|                                 |                                                                                                                                                                                                                                         |
|---------------------------------|-----------------------------------------------------------------------------------------------------------------------------------------------------------------------------------------------------------------------------------------|
| Journal:                        | <i>BMJ Open</i>                                                                                                                                                                                                                         |
| Manuscript ID:                  | bmjopen-2011-000698.R1                                                                                                                                                                                                                  |
| Article Type:                   | Research                                                                                                                                                                                                                                |
| Date Submitted by the Author:   | 08-Mar-2012                                                                                                                                                                                                                             |
| Complete List of Authors:       | Richardson, Andrea; UNC Chapel Hill, Nutrition<br>Boone-Heinonen, Janne; Oregon Health & Science University, Public Health & Preventive Medicine<br>Popkin, Barry; UNC Chapel Hill, Nutrition<br>Gordon-Larsen, Penny; UNC Chapel Hill, |
| <b>Primary Subject Heading</b>: | Epidemiology                                                                                                                                                                                                                            |
| Secondary Subject Heading:      | Public health, Nutrition and metabolism                                                                                                                                                                                                 |
| Keywords:                       | NUTRITION & DIETETICS, PUBLIC HEALTH, STATISTICS & RESEARCH METHODS                                                                                                                                                                     |
|                                 |                                                                                                                                                                                                                                         |

SCHOLARONE™  
Manuscripts

1  
2  
3 **Are neighborhood food resources distributed inequitably by income and race in the United**  
4  
5 **States? Epidemiologic findings across the urban spectrum**  
6  
7

8 Andrea S. Richardson<sup>1</sup>, Janne Boone-Heinonen<sup>2</sup>, Barry M. Popkin<sup>1</sup>, and Penny Gordon-Larsen<sup>1</sup>  
9

10  
11 <sup>1</sup>Department of Nutrition, University of North Carolina at Chapel Hill; Carolina Population  
12  
13 Center, 123 West Franklin St. Campus Box 8120, Chapel Hill, NC USA  
14  
15

16  
17 <sup>2</sup>Public Health & Preventive Medicine, Oregon Health & Science University; 3181 SW Sam  
18  
19 Jackson Park Road, Mail Code CB 669, Portland, OR 97239-3098, USA  
20  
21

22 Please Address Correspondence & Reprint Requests To:  
23

24  
25 Penny Gordon-Larsen  
26  
27

28  
29 University of North Carolina at Chapel Hill  
30  
31

32 Carolina Population Center  
33  
34

35 123 West Franklin St. CB#8120  
36  
37

38 Chapel Hill, NC 27516-3997, USA  
39  
40

41 Phone: (W) 919-843-9966; Fax: 919-966-9159  
42  
43  
44  
45  
46  
47

48 **Keywords (MeSH\*):** Epidemiology, United States, \*Diet, Geographic Information Systems,  
49  
50 Environment, Environment Design, Fast Foods, Restaurants, Young Adult  
51  
52

53 Abstract 299 words  
54  
55

56 Text 3,725 words excluding title page, abstract, references, and tables  
57  
58  
59  
60

## SUMMARY

## 1) Article Focus

- **Using national data, we examined whether neighborhood food resource availability exhibits joint race and socioeconomic inequities across levels of urbanicity.**

## 2) Key Messages

- **Sociodemographic inequities in neighborhood food resource availability were most pronounced in low density urban (largely suburban) areas.**
- **In high density urban areas, higher neighborhood poverty was associated with *greater* availability of all food resources.**
- **Whereas policy has focused on dense, urban settings, less urban areas might also benefit from policies addressing food access**

## 3) Strengths and Limitations

- **While business records provide comparable data across the US, these data may contain error and do not indicate availability of specific foods.**
- **National coverage enabled examination of the joint role of neighborhood race and socioeconomic status across urban strata within a single study.**



## Abstract

**Objective.** Many recent policies focus on socioeconomic inequities in availability of healthy food stores and restaurants. Yet understanding of how socioeconomic inequities vary across neighborhood racial composition and across the range from rural to urban settings is limited, largely due to lack of large, geographically and sociodemographically diverse study populations. Using a national sample, we examined differences in neighborhood food resource availability according to neighborhood-level poverty and racial/ethnic population in non-urban, low- and high-density urban areas.

**Design.** Cross-sectional data from an observational cohort study representative of the US middle and high school-aged population in 1994 followed into young adulthood.

**Participants.** Using neighborhood characteristics of participants in the National Longitudinal Study of Adolescent Health (Wave III, 2001-02; n=13,995 young adults 18-28 years of age representing 7,588 US block groups), we examined associations between neighborhood poverty and race/ethnicity with neighborhood food resource availability in urbanicity-stratified multivariable linear regression.

**Primary and Secondary outcome measures:** Neighborhood availability of grocery/supermarkets, convenience stores, and fast food restaurants (measured as number of outlets per 100 km roadway).

**Results.** Neighborhood race and income disparities were most pronounced in low density urban areas, where high poverty/high minority areas had lower availability of grocery/supermarkets [beta coefficient (beta)= -1.91; 95% confidence interval (CI) -2.73, -1.09] and convenience stores (beta=-2.38, CI: -3.62, -1.14) and greater availability of fast food

1  
2  
3 restaurants (beta=4.87, CI: 2.26, 7.48) than low poverty/low minority areas. However, in **high**  
4  
5 **density**, urban areas, high poverty/low minority neighborhoods had comparatively greater  
6  
7 availability of grocery/supermarkets (beta=8.05, CI: 2.52, 13.57), convenience stores (beta=2.89,  
8  
9 CI: 0.64-5.14), and fast food (beta=4.03, CI: 1.97, 6.09), relative to low poverty/low minority  
10  
11 areas.  
12  
13

14  
15 **Conclusions.** In addition to targeting disproportionate fast food availability in disadvantaged  
16  
17 dense urban areas, our findings suggest that policies should also target disparities in  
18  
19 grocery/supermarket and fast food restaurant availability in low density areas.  
20  
21  
22  
23  
24  
25  
26  
27  
28  
29  
30  
31  
32  
33  
34  
35  
36  
37  
38  
39  
40  
41  
42  
43  
44  
45  
46  
47  
48  
49  
50  
51  
52  
53  
54  
55  
56  
57  
58  
59  
60

## INTRODUCTION

National, state, and local policies increasingly focus on improving availability of healthy foods in disadvantaged neighborhoods. Expectations that such policies will improve diets in low income and race/ethnic minority populations stem from evidence that inequitable access to healthy foods may underlie differentials in diet quality [1-4], obesity [5], and related diseases by income and race/ethnicity (see reviews [6-11]). However, understanding the extent to which inequities in different types of food resources exist in different types of U.S. communities is limited by several factors.

First, research has focused on “food deserts”, generally defined as areas with limited access to affordable fresh foods from supermarkets (see reviews [8-11]). Subsequently, “food swamps” [12, 13], characterized as neighborhoods with disproportionate access to convenient, energy dense, nutrient poor foods sold by convenience stores and fast food restaurants, emerged as important dimensions of the food environment. Thus, attention to a variety of food resources, such as supermarkets, convenience stores, and fast food restaurants, may be a more useful approach to examining neighborhood food availability [11, 14, 15].

**Second, most existing food access initiatives target low income, dense urban areas, yet inequities in access to healthy foods may be even more pronounced in suburban and rural areas due to greater dispersion of resources and car-dependent infrastructure [14]. In addition, geographic distribution of food outlets relative to homes, transportation infrastructure, and other resources differs across urbanicity [20, 21], perhaps due to differences in travel times to community resources [22] and population density. Yet few studies examine how inequities in availability of food resources might vary by urbanicity [9, 16-18], and limited understanding relies on comparisons across small, geographically**

1  
2  
3 **specific study populations (e.g. New Orleans compared to Texas colonias). Generalizable**  
4  
5 **understanding requires large, national study populations.**  
6  
7

8 Third, allocation of food resources according to income has received the most focus, with  
9  
10 some examination of race/ethnic differences. **Consideration of neighborhood socioeconomic**  
11 **status alone has not yielded consistent results [15, 22-24], which suggests that other**  
12 **neighborhood characteristics underlie food resource allocation.** Patterning by race/ethnicity  
13  
14 may further compound patterning according to income and would underscore the importance of  
15  
16 culturally sensitive policies. However, the joint role of neighborhood race/ethnic composition  
17  
18 and neighborhood income has received little attention [25].  
19  
20  
21  
22  
23

24 Using GIS-derived neighborhood characteristics from a national sample of 13,995 young  
25  
26 adults across the US provides variation and sufficient sample size to examine disparities in  
27  
28 neighborhood food resource availability according to income, race/ethnicity, and urbanicity. We  
29  
30 examined the joint role of neighborhood race/ethnic composition and neighborhood poverty  
31  
32 across non-urban, low density urban, and high density urban areas. Specifically, we tested  
33  
34 whether individuals living in neighborhoods comprised of populations with high proportions of  
35  
36 impoverished and minority residents had lower availability of grocery/supermarkets and greater  
37  
38 availability of fast-food restaurants and convenience stores (compared to lower poverty areas  
39  
40 with high proportion of non-Hispanic white populations), and whether this distribution varied  
41  
42 across less urban and more urban areas.  
43  
44  
45  
46  
47  
48  
49  
50  
51  
52  
53  
54  
55  
56  
57  
58  
59  
60

## METHODS

### Study population and data sources

Our study sample is derived from respondents aged 18 to 24 years who participated in Wave III (2001-02) of the National Longitudinal Study of Adolescent Health (Add Health), a nationally representative, prospective cohort study of adolescents of the US school-based population in grades 7 to 12 (11-22 years of age) in 1994-95 who are followed into adulthood (wave III). Subjects eligible for inclusion in the analytic sample included 14,322 Wave III young adults with sample weights. The Add Health sample was collected under protocols approved by the Institutional Review Board at the University of North Carolina. The survey design and sampling frame have been discussed elsewhere [26, 27]. The authors have no conflicts of interest to declare and have each made 1) substantial contributions to conception and design, acquisition of data, or analysis and interpretation of data; 2) drafting the article or revising it critically for important intellectual content; and 3) final approval of the version to be published.

We used the Add Health Obesity and Neighborhood Environment database (ONEdata), a Geographic Information System that includes time-varying, community-level data geographically linked to respondent residential addresses geocoded with street-segment matches (n=13,039), global positioning system (GPS) measurements (n=1,204), and ZIP/ZIP+4/ZIP+2 centroid match (n=685). Attributes of areas within 1, 3, 5, and 8.05 km of each respondent location (neighborhood buffers) and block group, tract, and county attributes from time-matched U.S. Census and other federal sources were merged with individual-level Add Health interview responses [28]. The number of census block groups (n=7,588) represents 3.6% of 2000 US Census block groups.

1  
2  
3 Of 14,322 Wave III respondents with sample weights, 327 (2.3%) with missing food  
4 environment or US census data were excluded, leaving an analytic sample of 13,995.  
5  
6  
7  
8  
9

## 10 **Study variables**

### 11 *GIS-derived neighborhood data*

12  
13 For our central analysis we used residential locations linked to attributes of areas within 3  
14 km straight line distance (Euclidean buffer) and along the street network (street network buffer)  
15 surrounding each respondent's residential location in the Wave III (2001). **The 3 km buffer was**  
16 **designed to capture distances readily accessible by walking and driving to neighborhood**  
17 **diet- and activity-related resources [2, 3, 29, 30].** Comparative analyses were conducted with 1  
18 and 8 km buffers. Neighborhood food environment, sociodemographic, and urban indicator data  
19 were merged with individual-level Add Health interview data.  
20  
21  
22  
23  
24  
25  
26  
27  
28  
29  
30  
31  
32  
33

### 34 *Food environment*

35  
36 Food resource data were obtained from Dun and Bradstreet, a commercial dataset of US  
37 businesses. Food resources were classified according to 4- and 8-digit Standard Industrial  
38 Classification (SIC) codes. Three categories of food resources were used: 1) fast-food  
39 restaurants, defined as fast-food chain and non-chain restaurants, excluding food stands and  
40 cafeterias; 2) grocery stores and supermarkets, defined as independent and chain grocery stores  
41 and supermarkets; and 3) convenience stores, defined as variety & convenience stores and food  
42 stores attached to gasoline filling stations. Full details are described in Appendix A.  
43  
44  
45  
46  
47  
48  
49  
50  
51  
52

53 **We characterized neighborhood food resource availability as the count of each type**  
54 **of resource per roadway distance within a 3 kilometer street network buffer, which**  
55  
56  
57  
58  
59  
60

1  
2  
3 **represents availability to resources relative to the street network and potentially reflects**  
4 **routes of travel [31]. While others have used measures such as the modified retail food**  
5 **environment index [32], which measures the availability of healthy relative to unhealthy**  
6 **food stores, ratio measures may obscure differential variation across food outlet types.**  
7  
8 **Since this is a major focus of the current study, we use absolute measures of fast food,**  
9 **convenience stores and supermarkets and examine each resource type separately. In**  
10 **addition, by controlling for population density we capture resources relative to what might**  
11 **be expected with respect to population distribution. Given the variation in classification of**  
12 **the food environment in the literature (see review [33]), we present findings across several**  
13 **different food environment measures (e.g., count per population, distance to nearest outlet).**

14  
15  
16  
17  
18  
19  
20  
21  
22  
23  
24  
25  
26  
27  
28  
29  
30  
31  
32  
33  
34  
35  
36  
37  
38  
39  
40  
41  
42  
43  
44  
45  
46  
47  
48  
49  
50  
51  
52  
53  
54  
55  
56  
57  
58  
59  
60

Given the importance of scaling resources by general urban development, we created measures of resources per 100 kilometers of secondary/connecting and local, neighborhood and rural roads using street data obtained from StreetMap Pro (July 2003, v.5.2) data from Environmental Systems Research Institute (ESRI, [www.esri.com](http://www.esri.com)) in Redlands, CA. We selected the 3km street network buffer after evaluating associations with resource availability and sensitivity of buffer size. We thus defined neighborhood food resource availability as the number of outlets per 100 kilometer of roadway within a 3 km network buffer to account for differences in food resource counts according to the amount of commercial activity in an area.

#### *Neighborhood sociodemographics*

Census block groups were used to define neighborhoods because smaller units are more likely to adhere to individually perceived neighborhood boundaries [34] and are more sociodemographically homogeneous. Using the federal definition of “poverty area” [35, 36], we dichotomized neighborhood poverty into >20% or ≤20% of population below the federal poverty

1  
2  
3 level. We defined neighborhood minority population as percent of population of non-Hispanic  
4 white race/ethnicity and neighborhood-level education as percent of population  $\geq 25$  years with  
5 college or greater education. **While other studies have used a neighborhood deprivation**  
6 **index to provide an “empirical summary of total area-level variance explained by the**  
7 **census variables” [37], we investigated neighborhood race/ethnicity and income as *separate***  
8 **constructs. We focus on these two specific characteristics to address the theoretical**  
9 **processes of resource placement in areas with greater purchasing power (income) and**  
10 **political leverage associated with the majority race.** To evaluate potential interaction of  
11 neighborhood poverty status with minority population we created a categorical variable: 1) low  
12 poverty/low minority, 2) high poverty/low minority, 3) low poverty/medium minority, 4) high  
13 poverty/medium minority, 5) low poverty/high minority, 6) high poverty/high minority.  
14  
15  
16  
17  
18  
19  
20  
21  
22  
23  
24  
25  
26  
27  
28  
29  
30  
31  
32

### 33 *Neighborhood Urbanicity*

34  
35 **Most studies characterize urbanicity based on population density [19]. We improve**  
36 **on such traditional definitions by using US Census-defined urbanized areas (UA) to classify**  
37 **residential locations as non-urban (outside UA) or urban (inside UA).** Within urban areas,  
38 we used Fragstats [38] software with US Geologic Survey National Landcover Data to  
39 distinguish: 1) low density [ $\leq 95\%$  (75th percentile) developed land cover] and 2) high density  
40 [ $> 95\%$  developed land cover] urban areas based on the area of developed land as a proportion of  
41 total area within 3km after excluding water and ice. Our measure of developed land cover  
42 provides an indicator of urban development that is independent of population density and  
43 correctly classifies areas as within or outside of a UA (Receiver Operating Characteristic curve  
44 area=0.937).  
45  
46  
47  
48  
49  
50  
51  
52  
53  
54  
55  
56  
57  
58  
59  
60



## Statistical analysis

### *Descriptive analysis*

Availability of food resources and sociodemographic characteristics were compared across non-urban, low density urban, and high density urban strata. We examined urbanicity-specific tertiles of neighborhood minority population (Table 1) to address non-linear associations with food resource availability measures. All statistical analyses were weighted for national representation and corrected for complex survey design using Stata 11.1 (Stata Corp, College Station, TX).

### *Multivariable regression analysis*

We fit multivariable linear regression models to predict food resource availability as a function of neighborhood poverty and minority population where our constructed variable combining neighborhood poverty (high and low) with levels of minority population (low, medium, high) explicitly estimates interactions relative to the theoretically most advantaged neighborhoods (low poverty/low minority). Given that food resources and neighborhood sociodemographics varied dramatically across urbanicity, comparability across sociodemographic and geographic subpopulations was difficult, even with our large sample size. Nonetheless, we have large samples of individuals and block groups across urbanicity strata, with adequate variation across neighborhood sociodemographics (Table 1). All models were weighted for national representation, corrected for clustering on our primary sampling unit (schools) and controlled for continuous neighborhood-level education and population density dichotomized into urbanicity-specific quantiles. Given that schools and census block groups are

1  
2  
3 not geographically nested, we did not use multi-level analysis. Further, multi-level analysis of  
4  
5 unbalanced, sparse data within census block groups can result in biased estimates [39].  
6  
7

8 To aid interpretation of the model results, we used the estimated model coefficients to  
9  
10 predict food resource availability across levels of neighborhood-level poverty and minority  
11  
12 population within the low density-urban stratum, where the strongest disparities were observed.  
13  
14

### 15 16 17 **Comparative analyses** 18

19  
20 In order to assess whether different neighborhood buffer sizes were needed in urban  
21  
22 versus non-urban areas, we compared and found similar patterns for the 1 km buffer in urban  
23  
24 areas and the 8 km buffer in non-urban areas. In addition, we assessed alternate measures of  
25  
26 food resource availability to compare our main measure findings with commonly used though  
27  
28 conceptually different metrics: count per population [2] and distance to nearest outlet [4, 14, 40].  
29  
30 Specifically, we contrasted our roadway-scaled measure with: 1) density of food resources per  
31  
32 10,000 population within 3 km Euclidean buffer; and 2) minimum distance to the single nearest  
33  
34 food resource within 8 km Euclidean buffer. We repeated identical multivariable regression  
35  
36 models with alternate measures, except models with population-scaled measures did not control  
37  
38 for population density. Results for food resources per 100 kilometer of roadway within a 3 km  
39  
40 network buffer are presented in text, while results for all other measures are shown in  
41  
42 Appendices B-C.  
43  
44  
45  
46  
47  
48  
49  
50  
51  
52  
53  
54  
55  
56  
57  
58  
59  
60

## RESULTS

Neighborhood availability of grocery/supermarkets, convenience stores, and fast food restaurants varied dramatically across non-urban, low density urban and high density urban areas, with greater availability in high density urban areas (Table 2).

In multivariable analysis, availability of grocery/supermarkets and convenience stores for low density urban residents did not differ according to neighborhood poverty; rather, lower availability of food stores was observed with greater minority populations (Table 3). Food stores were more equitably allocated in non-urban neighborhoods. Interestingly, greater availability of food stores was often found in high density urban areas with high proportions of low income residents, but this relationship with neighborhood income did not hold in neighborhoods with high proportion of minority residents.

Fast food availability was greater for residents in high poverty neighborhoods, with strongest associations in low and high density urban areas (Table 3). Among those living in neighborhoods with high poverty, greater minority population incurred additional inequities in food resource availability, particularly in low density urban areas. In a notable exception, in high density urban, high minority areas, fast food was *less* available in high poverty neighborhoods.

Figure 1 presents predicted food resource availability (based on the Table 3 models) and more clearly illustrates the differential associations with poverty versus race/ethnicity in non-urban, low density urban, and high density urban areas.

In general, estimated patterns of disparities were very similar between roadway-scaled, population density and distance measures (Appendices B-C).

## DISCUSSION

We assessed inequities in grocery/supermarket, convenience store, and fast-food restaurant availability by neighborhood poverty and minority population in a large, diverse national sample of residential neighborhoods of young adults, representing 7,588 census block groups (3.6% of 2000 US Census block groups). Our findings suggest that inequities in **neighborhood food resource availability** do exist, but not always where prior research suggests. In particular, racial and income disparities in availability of grocery/supermarkets were far more apparent in low density urban areas than in high density urban areas, where food deserts have been shown to exist [23, 41-43]. In an unexpected finding, areas with high poverty and high minority population also have lower availability of convenience stores, which typically provide largely energy dense, nutrient poor foods [44, 45]. Greater availability of fast food in areas with high poverty rates and high minority population was more consistent across non-urban, low density urban and high density urban areas.

Differences in availability of grocery/supermarkets, convenience stores, and fast-food restaurants were most consistent in low density urban areas, which include the largest proportion of our sample and theoretically captures suburban America. In the US, we also note that the distribution of poverty has shifted away from the dense inner cities. Data from the 2010 census suggest that counter to the assumption of “White Flight” out of inner cities, racial minorities, foreign-born, and low income people were more likely to live in metropolitan suburbs in 2010 than the cities they lived in during 2008 [46]. Thus, the income and race/ethnic disparities in neighborhood food resource availability observed in low density urban areas in our 2001 data may become much more important as poor and minority populations increasingly reside in suburban neighborhoods. Our findings suggest that in addition to increasing grocery store

1  
2  
3 availability and limiting fast food availability in disadvantaged dense urban areas, rural and  
4  
5 suburban areas should be targeted for food environment improvements. While this idea has been  
6  
7 suggested by a series of studies in rural Texas [20], our national study further supports more  
8  
9 focus on rural and suburban food environments.  
10  
11

12 Relationships between food resource availability, neighborhood poverty, and minority  
13  
14 population were notably distinct in high density urban areas. **It is possible that fewer**  
15  
16 **significant findings in high density urban areas might reflect lower statistical power due to**  
17  
18 **smaller sample size (1,935 high density urban vs. 4,132 low density urban block groups), or**  
19  
20 **greater variability in high density urban relative to other areas. Yet, the pattern of**  
21  
22 **findings suggests variation across the spectrum of urbanicity.** First, our finding of *greater*  
23  
24 availability of grocery stores and convenience stores in high versus low poverty areas, but only  
25  
26 in areas with predominately white populations, suggests the presence of complex economic and  
27  
28 social drivers in where food stores choose to locate. Second, fast food availability was generally  
29  
30 greater in high poverty, high minority areas, but this was not true in high minority, high density  
31  
32 urban areas. This finding is consistent with prior evidence [11, 47] that perceived or real racial  
33  
34 tensions or safety concerns may also influence opening and closure of food establishments.  
35  
36  
37  
38  
39

40 Findings using our main roadway scaled measures and population density measures were  
41  
42 nearly identical as they likely capture resources scaled by commercialization and development  
43  
44 indicated by population and roadways. Slight inconsistencies in results for the minimum  
45  
46 distance measures and may reflect increased variation that results from using a single data point  
47  
48 (nearest outlet) to characterize availability compared to incorporating data from multiple  
49  
50 resources within an area. Minimum distance measures also do not account for differential  
51  
52 distribution of food resources according to population and development density.  
53  
54  
55  
56  
57  
58  
59  
60

## Strengths and limitations

This study did not look at extreme poverty nor consider a large array of other factors linked with urbanicity. It is possible that disparities in food resources in dense, urban areas may be evident only under extreme neighborhood poverty that we did not examine in our analysis. More refined analyses of dynamic effects among social and economic environments and food resources are beyond the scope of the present analysis though they certainly warrant further attention. Moreover, other factors such as crime [47], aesthetics [47], travel time [48], or proximity to other resources [47] could also relate to actual or perceived access to food resources.

The benefit of business record data, which provides comparative national food resource data, must be balanced with their limitations. **Business record data contains error, which can bias results either toward the null if misclassification is non-differential or away from the null in the case of differential misclassification. It is also possible that the accuracy of business records varies by area sociodemographics and/or urbanicity [49-53].** **Neighborhood audits (street-by-street data collection by researchers) better capture broader dimensions of food access such as food prices or cultural preferences, but they are not feasible for large national samples across thousands of census blocks groups. These intense audits are generally performed in smaller geographic areas, and thus preclude broad comparisons across neighborhood type and sociodemographics.** We were unable to ascertain food sold at each establishment and relied on generalizations regarding healthy (grocery/supermarket) versus unhealthy (convenience store, fast food restaurant) types of establishments.

1  
2  
3 **Although supercenters have recently gained a significant share of the food retailing**  
4 **market, during the contemporaneous study period supercenters held only a minority**  
5 **proportion of the household purchases compared to grocery stores and supermarkets [54].**  
6  
7 **Furthermore, access to supercenters often requires driving outside of residential**  
8 **neighborhoods, given their size and placement. For these reasons, supercenters were not**  
9 **addressed.**  
10

11  
12  
13  
14  
15  
16  
17 Further, due to lower participation of illegal immigrants in the census, US census data  
18 may underestimate neighborhood minority population and poverty. Our 3 km network  
19 residential neighborhood buffer may not accurately reflect food purchasing areas for different  
20 urban settings and sociodemographic subgroups; this is a topic worthy for future study. In  
21 addition, this is a cross-sectional study and thus does not capture changes in food environments  
22 over time.  
23  
24  
25  
26  
27  
28  
29  
30

31  
32 Despite these limitations, our study is an essential step in understanding the allocation of  
33 theoretically healthy and less healthy food resources across social and geographic space over the  
34 entire US, and our findings can inform measurement and design in future individual-level and  
35 longitudinal studies. Our study benefits from the variation in neighborhoods of a large population  
36 that enables comparisons across multiple sociodemographic and urban strata within a single  
37 study. Further, our study capitalizes upon national data with roadway scaled measures of  
38 neighborhood food resource availability within 3 km residential network buffers for each  
39 observation. In addition, we used detailed measures of urbanicity derived both from US census  
40 and landcover data allowing a more refined urban/rural classification than the traditional  
41 urban/rural dichotomy. In sum, our study benefits from several innovations and depth of  
42 coverage that has been heretofore unaddressed in a large, geographically diverse study.  
43  
44  
45  
46  
47  
48  
49  
50  
51  
52  
53  
54  
55  
56  
57  
58  
59  
60

## Policy implications

Many state and national efforts focus on providing healthy eating options for poor inner-city neighborhoods, many with high minority populations. Strategies include providing produce carts in low income neighborhoods in New York City [55], directly or indirectly subsidizing supermarkets [56-59], banning fast-food restaurant construction in selected urban areas [60], as well as legislation considered at the national level [61]. Our results suggest that less urban areas might benefit from similar policies.

## Conclusion

Our findings suggest that common assumptions regarding income and race-ethnic subpopulation disparities in food resources may not be universally true across the spectrum of urbanicity. We observed an association between greater neighborhood poverty and minority population with greater availability of fast-food restaurants in urban areas. Conversely, disparities in grocery/supermarkets were primarily observed in low density urban areas. Our findings suggest that poverty and race may play distinct roles in how food resources are allocated and that underlying social complexities should be further explored in dense urban, suburban, and rural areas.

## ACKNOWLEDGEMENTS

The authors would like to thank Brian Frizzelle, Marc Peterson, Chris Mankoff, James D. Stewart, Phil Bardsley, and Diane Kaczor of the University of North Carolina, Carolina Population Center (CPC) and the CPC Spatial Analysis Unit for creation of the environmental



1  
2  
3 variables. The authors also thank Ms. Frances Dancy for her helpful administrative assistance.  
4  
5  
6 There were no potential or real conflicts of financial or personal interest with the financial  
7  
8 sponsors of the scientific project.  
9

10 This work was funded by National Institutes of Health grant R01HD057194, R01-  
11  
12 HL104580, R01 HD041375, R01HD39183, and R01HLI04580, a cooperative agreement with  
13  
14 the Centers for Disease Control and Prevention (CDC SIP No. 5-00). The authors are also  
15  
16 grateful to R24 HD050924 from the Eunice Kennedy Shriver National Institute of Child Health  
17  
18 and Human Development (NICHD) for broad support of the authors, although no funding was  
19  
20 provided by this grant. Analysis and manuscript preparation was supported by the  
21  
22 Interdisciplinary Obesity Training postdoctoral fellowship (T32MH075854-04).  
23  
24  
25

26  
27 Data sharing: This research uses data from Add Health, a program project designed by J.  
28  
29 Richard Udry, Peter S. Bearman, and Kathleen Mullan Harris, and funded by a grant P01-  
30  
31 HD31921 from the Eunice Kennedy Shriver National Institute of Child Health and Human  
32  
33 Development, with cooperative funding from 17 other agencies. Special acknowledgment is due  
34  
35 Ronald R. Rindfuss and Barbara Entwisle for assistance in the original design. Persons interested  
36  
37 in obtaining data files from Add Health should contact Add Health, CPC, 123 W. Franklin  
38  
39 Street, Chapel Hill, NC 27516-2524 ([addhealth@unc.edu](mailto:addhealth@unc.edu)). No direct support was received from  
40  
41 grant P01-HD31921 for this analysis.  
42  
43  
44  
45  
46  
47  
48  
49  
50  
51  
52  
53  
54  
55  
56  
57  
58  
59  
60

Table 1. Urbanicity-specific<sup>a</sup> neighborhood demographics, National Longitudinal Study of Adolescent Health, Wave III (2001-2), n=13,995.

|                                                                    | Non-urban   | Low density urban | High density urban |
|--------------------------------------------------------------------|-------------|-------------------|--------------------|
| Count (census block groups)                                        | 1,530       | 4,132             | 1,935              |
| Count (Add Health respondents)                                     | 3,779       | 6,676             | 3,549              |
| % College educated or above <sup>b</sup> - mean (SD)               | 16.6 (0.8)  | 25.5 (1.1)        | 22.2 (1.8)         |
| Population density (persons/km <sup>2</sup> ) <sup>c</sup> - range |             |                   |                    |
| Low                                                                | 0.2-80.4    | 15.4-981.3        | 555.2-2651.2       |
| High                                                               | 80.7-2299.9 | 981.4-26514.7     | 2651.5-22952.4     |

<sup>a</sup> Non-urban: distance to Urbanized Area (UA) >0, low density urban: distance to UA=0 & % developed land cover, excluding water and ice (land developed) <=95%, high density urban: distance to UA=0 & % land developed >95%.

<sup>b</sup> Census block group

<sup>c</sup> Within 3km Euclidean buffer around individual residence

Table 2. Means and (SD) of food resources<sup>a</sup> (Count per 100 km secondary and local road within 3 km network buffer around each individual residence)<sup>b</sup>. National Longitudinal Study of Adolescent Health, Wave III (2001-2), n=13,995, by urbanicity<sup>c</sup>

| Neighborhood                             |                                                      |       |                     |                    |              |
|------------------------------------------|------------------------------------------------------|-------|---------------------|--------------------|--------------|
| Percent poverty <sup>d,e</sup> within 3k | Percent minority population <sup>d,f</sup> within 3k | N     | Grocery/supermarket | Convenience stores | Fast food    |
| Non-urban                                |                                                      |       |                     |                    |              |
| Low                                      | Low                                                  | 545   | 0.22 (0.08)         | 0.91 (0.42)        | 2.48 (0.47)  |
|                                          | Medium                                               | 954   | 0.14 (0.03)         | 0.34 (0.07)        | 2.04 (0.23)  |
|                                          | High                                                 | 1024  | 0.05 (0.02)         | 0.22 (0.05)        | 1.43 (0.24)  |
| High                                     | Low                                                  | 715   | 0.33 (0.20)         | 2.00 (1.21)        | 3.22 (0.53)  |
|                                          | Medium                                               | 306   | 0.08 (0.04)         | 0.17 (0.08)        | 5.03 (0.72)  |
|                                          | High                                                 | 232   | 0.12 (0.06)         | 0.27 (0.14)        | 1.68 (0.91)  |
| Total                                    |                                                      | 3,779 | 0.15 (0.05)         | 0.62 (0.27)        | 2.33 (0.21)  |
| Low density urban                        |                                                      |       |                     |                    |              |
| Low                                      | Low                                                  | 1320  | 3.47 (0.39)         | 4.57 (0.66)        | 5.71 (0.39)  |
|                                          | Medium                                               | 1757  | 1.90 (0.17)         | 2.77 (0.19)        | 5.30 (0.21)  |
|                                          | High                                                 | 2078  | 0.84 (0.15)         | 1.55 (0.27)        | 4.32 (0.18)  |
| High                                     | Low                                                  | 910   | 3.81 (0.58)         | 4.20 (0.46)        | 6.48 (0.36)  |
|                                          | Medium                                               | 477   | 2.25 (0.47)         | 3.18 (0.43)        | 9.40 (0.50)  |
|                                          | High                                                 | 129   | 1.28 (0.38)         | 1.91 (0.45)        | 10.31 (1.24) |
| Total                                    |                                                      | 6,676 | 2.06 (0.22)         | 2.86 (0.26)        | 5.58 (0.19)  |
| High density urban                       |                                                      |       |                     |                    |              |
| Low                                      | Low                                                  | 767   | 8.21 (2.96)         | 7.47 (0.81)        | 6.83 (1.33)  |
|                                          | Medium                                               | 786   | 8.06 (2.55)         | 9.74 (1.12)        | 7.32 (1.17)  |
|                                          | High                                                 | 870   | 7.19 (1.82)         | 11.31 (1.85)       | 6.71 (0.85)  |
| High                                     | Low                                                  | 418   | 15.97 (5.46)        | 10.08 (1.80)       | 9.70 (2.45)  |
|                                          | Medium                                               | 400   | 9.70 (4.22)         | 9.69 (1.92)        | 7.12 (2.13)  |
|                                          | High                                                 | 307   | 7.09 (1.46)         | 9.95 (0.65)        | 7.10 (1.20)  |
| Total                                    |                                                      | 3,549 | 8.72 (2.31)         | 7.24 (1.08)        | 10.18 (1.14) |

<sup>a</sup> See Appendix A for SIC codes for grocery/supermarkets, convenience stores, and fast food

<sup>b</sup> Means and SD corrected for clustering and weighted for representation.

<sup>c</sup> Non-urban: distance to Urbanized Area (UA) >0, low density urban: distance to UA=0 & % developed land cover, excluding water and ice (land developed) <=95%, high density urban: distance to UA=0 & % land developed >95%.

<sup>d</sup> Census block group

<sup>e</sup> Greater than 20% of population below the federal poverty level

<sup>f</sup> Percent non-Hispanic White population. Non-urban (Low:0-74.7%, Medium: 74.8-96.3%, High: 96.4-100%), Low density urban (Low: 0-70.7%, Medium: 70.8-90.5% High: 90.6-100%) High density urban (Low: 0-31%, Medium: 31.1-63.7%, High: 63.8-100%)

Table 3. Associations between high neighborhood poverty<sup>a</sup> and urbanicity-specific minority composition<sup>b</sup> and high neighborhood and food resource<sup>c</sup> availability [beta coefficient (95% CI)]<sup>d</sup> National Longitudinal Study of Adolescent Health, Wave III (2001-2), n=13,995, by urbanicity<sup>e</sup>

| Food resource<br>(count per<br>100 km<br>secondary<br>and local road<br>within 3 km<br>network<br>buffer) | Neighborhood                                   |                                                                       | Non-urban                                         | Low density urban                                 | High density urban                                |
|-----------------------------------------------------------------------------------------------------------|------------------------------------------------|-----------------------------------------------------------------------|---------------------------------------------------|---------------------------------------------------|---------------------------------------------------|
|                                                                                                           | Percent<br>poverty <sup>a,f</sup><br>within 3k | Percent<br>minority<br>popula-<br>tion <sup>b,f</sup><br>within<br>3k | beta coefficient<br>( 95% Confidence<br>Interval) | beta coefficient<br>( 95% Confidence<br>Interval) | beta coefficient<br>( 95% Confidence<br>Interval) |
| Grocery/super<br>market                                                                                   | Low                                            | Low                                                                   | 0.0                                               | 0.0                                               | 0.0                                               |
|                                                                                                           |                                                | Medium                                                                | -0.09 (-0.23, 0.05)                               | -1.17 (-1.72, -0.63)*                             | -2.11 (-7.54, 3.31)                               |
|                                                                                                           |                                                | High                                                                  | -0.13 (-0.28, 0.01)                               | -1.76 (-2.39, -1.13)*                             | 1.70 (-2.38, 5.77)                                |
|                                                                                                           | High                                           | Low                                                                   | 0.09 (-0.21, 0.40)                                | 0.26 (-0.70, 1.21)                                | 8.05 (2.52, 13.57)†                               |
|                                                                                                           |                                                | Medium                                                                | -0.18 (-0.37, 0.00)                               | -1.35 (-2.36, -0.33)*                             | 4.96 (-1.74, 11.65)†                              |
|                                                                                                           |                                                | High                                                                  | 0.00 (-0.18, 0.18)†                               | -1.91 (-2.73, -1.09)*                             | -0.72 (-5.68, 4.24)*                              |
| Convenience<br>store                                                                                      | Low                                            | Low                                                                   | 0                                                 | 0                                                 | 0                                                 |
|                                                                                                           |                                                | Medium                                                                | -0.54 (-1.26, 0.17)                               | -1.38 (-2.44, -0.32)*                             | -0.53 (-3.07, 2.01)                               |
|                                                                                                           |                                                | High                                                                  | -0.51 (-1.20, 0.17)                               | -2.05 (-3.17, -0.93)*                             | 1.56 (-0.41, 3.53)                                |
|                                                                                                           | High                                           | Low                                                                   | 1.01 (-0.69, 2.71)                                | -0.43 (-1.69, 0.84)                               | 2.89 (0.64, 5.14)†                                |
|                                                                                                           |                                                | Medium                                                                | -0.86 (-1.76, 0.04)†                              | -1.58 (-3.06, -0.11)*                             | 2.19 (-0.92, 5.31)†                               |
|                                                                                                           |                                                | High                                                                  | -0.27 (-0.92, 0.39)                               | -2.38 (-3.62, -1.14)*                             | 0.64 (-1.61, 2.88)                                |
| Fast food                                                                                                 | Low                                            | Low                                                                   | 0                                                 | 0                                                 | 0                                                 |
|                                                                                                           |                                                | Medium                                                                | -0.68 (-1.37, 0.01)                               | -0.01 (-0.63, 0.61)                               | 0.39 (-1.77, 2.54)                                |
|                                                                                                           |                                                | High                                                                  | -0.47 (-1.07, 0.14)                               | -0.44 (-1.12, 0.24)                               | 4.36 (1.44, 7.28)*                                |
|                                                                                                           | High                                           | Low                                                                   | 0.44 (-0.34, 1.23)                                | 0.73 (-0.08, 1.53)                                | 4.03 (1.97, 6.09)†                                |
|                                                                                                           |                                                | Medium                                                                | 1.80 (0.75, 2.86)*†                               | 3.47 (2.31, 4.64)*†                               | 4.85 (2.13, 7.57)†                                |
|                                                                                                           |                                                | High                                                                  | 0.82 (-0.62, 2.26)                                | 4.87 (2.26, 7.48)*†                               | 1.56 (-1.39, 4.50)                                |

<sup>a</sup> Greater than 20% of population below the federal poverty level

<sup>b</sup> Percent non-Hispanic White population. Non-urban (Low:0-74.7%, Medium: 74.8-96.3%, High: 96.4-100%), Low density urban (Low: 0-70.7%, Medium: 70.8-90.5% High: 90.6-100%) High density urban (Low: 0-31%, Medium: 31.1-63.7%, High: 63.8-100%)

<sup>c</sup> See Appendix A for SIC codes for grocery/supermarkets, convenience stores, and fast food

<sup>d</sup> Linear regression models, controlling for percent college educate and population density

<sup>e</sup> Non-urban: distance to Urbanized Area (UA) >0, low density urban: distance to UA=0 & % developed land cover, excluding water and ice (land developed) <=95%, high density urban: distance to UA=0 & % land developed >95%.

<sup>f</sup> Census block group

\* Statistically different (alpha=0.05) than low minority population, within poverty status stratum

† Statistically different (alpha=0.05) than low poverty status, within minority population stratum

## REFERENCES

1. de Vet E, de Ridder DT, de Wit JB. Environmental correlates of physical activity and dietary behaviours among young people: a systematic review of reviews. *Obesity reviews : an official journal of the International Association for the Study of Obesity*. [Research Support, Non-U.S. Gov't Review]. 2011 May;12(5):e130-42.
2. Boone-Heinonen J, Gordon-Larsen P, Kiefe CI, et al. Fast food restaurants and food stores: longitudinal associations with diet in young to middle-aged adults: the CARDIA study. *Arch Intern Med*. 2011 Jul 11;171(13):1162-70.
3. Richardson AS, Boone-Heinonen J, Popkin BM, et al. Neighborhood fast food restaurants and fast food consumption: a national study. *BMC Public Health*. 2011;11:543.
4. Timperio A, Ball K, Roberts R, et al. Children's fruit and vegetable intake: associations with the neighbourhood food environment. *Prev Med*. 2008 Apr;46(4):331-5.
5. Zick CD, Smith KR, Fan JX, et al. Running to the store? The relationship between neighborhood environments and the risk of obesity. *Soc Sci Med*. 2009 Nov;69(10):1493-500.
6. Giskes K, van Lenthe F, Avendano-Pabon M, et al. A systematic review of environmental factors and obesogenic dietary intakes among adults: are we getting closer to understanding obesogenic environments? *Obesity reviews : an official journal of the International Association for the Study of Obesity*. [Review]. 2011 May;12(5):e95-e106.
7. Fleischhacker SE, Evenson KR, Rodriguez DA, et al. A systematic review of fast food access studies. *Obes Rev*. 2011 May;12(5):e460-71.
8. Beaulac J, Kristjansson E, Cummins S. A systematic review of food deserts, 1966-2007. *Prev Chronic Dis*. 2009 Jul;6(3):A105.

- 1  
2  
3 9. Institute of Medicine and National Research Council. Workshop on the public health  
4 effects of food deserts: Workshop summary. Washington D.C.: National Academy 2009.
- 5  
6  
7  
8 10. Larson NI, Story MT, Nelson MC. Neighborhood environments: disparities in access to  
9 healthy foods in the U.S. *Am J Prev Med.* 2009 Jan;36(1):74-81.
- 10  
11  
12  
13 11. Walker RE, Keane CR, Burke JG. Disparities and access to healthy food in the United  
14 States: A review of food deserts literature. *Health Place.* 2010 Sep;16(5):876-84.
- 15  
16  
17  
18 12. Rose D, Bodor NJ, Swalm CM, et al. DESERTS IN NEW ORLEANS?  
19 ILLUSTRATIONS OF URBAN FOOD ACCESS AND IMPLICATIONS FOR POLICY.  
20 University of Michigan National Poverty Center/USDA Economic Research Service Research  
21 "Understanding the Economic Concepts and Characteristics of Food Access" 2009.
- 22  
23  
24  
25  
26  
27 13. Sturm R. Affordability and Obesity: Issues in the Multifunctionality of Agricultural/Food  
28 Systems. *J Hunger Environ Nutr.* 2009 Jul 1;4(3-4):454-65.
- 29  
30  
31  
32 14. USDA. Access to Affordable and Nutritious Food: Measuring and Understanding Food  
33 Deserts and Their Consequences: Economic Research Service 2009.
- 34  
35  
36  
37 15. Pearce J, Blakely T, Witten K, et al. Neighborhood deprivation and access to fast-food  
38 retailing: a national study. *Am J Prev Med.* 2007 May;32(5):375-82.
- 39  
40  
41  
42 16. Langellier BA. The food environment and student weight status, los angeles county,  
43 2008-2009. *Preventing chronic disease.* 2012 Feb;9:E61.
- 44  
45  
46  
47 17. Ahern M, Brown C, Dukas S. A national study of the association between food  
48 environments and county-level health outcomes. *J Rural Health.* [Research Support, U.S. Gov't,  
49 P.H.S.]. 2011 Sep;27(4):367-79.
- 50  
51  
52  
53  
54  
55  
56  
57  
58  
59  
60

- 1  
2  
3 18. Pearce J, Witten K, Hiscock R, et al. Regional and urban ^ rural variations in the  
4 association of neighbourhood deprivation with community resource access: a national study.  
5  
6 *nvironment and Planning A*. 2008(40):2469-89.  
7  
8  
9  
10 19. Sharkey JR, Horel S. Neighborhood socioeconomic deprivation and minority  
11 composition are associated with better potential spatial access to the ground-truthed food  
12 environment in a large rural area. *J Nutr*. 2008 Mar;138(3):620-7.  
13  
14  
15  
16  
17 20. Sharkey JR, Horel S, Han D, et al. Association between neighborhood need and spatial  
18 access to food stores and fast food restaurants in neighborhoods of colonias. *Int J Health Geogr*.  
19 2009;8:9.  
20  
21  
22  
23  
24 21. Smith DM, Cummins S, Taylor M, et al. Neighbourhood food environment and area  
25 deprivation: spatial accessibility to grocery stores selling fresh fruit and vegetables in urban and  
26 rural settings. *Int J Epidemiol*. 2010 Feb;39(1):277-84.  
27  
28  
29  
30  
31 22. Macdonald L, Ellaway A, Macintyre S. The food retail environment and area deprivation  
32 in Glasgow City, UK. *The international journal of behavioral nutrition and physical activity*.  
33 2009;6:52.  
34  
35  
36  
37  
38 23. Wang MC, Kim S, Gonzalez AA, et al. Socioeconomic and food-related physical  
39 characteristics of the neighbourhood environment are associated with body mass index. *J*  
40 *Epidemiol Community Health*. 2007 Jun;61(6):491-8.  
41  
42  
43  
44  
45 24. Wilson K, Eyles J, Ellaway A, et al. Health status and health behaviours in  
46 neighbourhoods: a comparison of Glasgow, Scotland and Hamilton, Canada. *Health & place*.  
47 [Comparative Study]. 2010 Mar;16(2):331-8.  
48  
49  
50  
51  
52  
53  
54  
55  
56  
57  
58  
59  
60

- 1  
2  
3  
4  
5  
6  
7  
8  
9  
10  
11  
12  
13  
14  
15  
16  
17  
18  
19  
20  
21  
22  
23  
24  
25  
26  
27  
28  
29  
30  
31  
32  
33  
34  
35  
36  
37  
38  
39  
40  
41  
42  
43  
44  
45  
46  
47  
48  
49  
50  
51  
52  
53  
54  
55  
56  
57  
58  
59  
60
25. Baker EA, Schootman M, Barnidge E, et al. The role of race and poverty in access to foods that enable individuals to adhere to dietary guidelines. *Prev Chronic Dis*. 2006 Jul;3(3):A76.
  26. Miller WC, Ford CA, Morris M, et al. Prevalence of chlamydial and gonococcal infections among young adults in the United States. *JAMA*. 2004 May 12;291(18):2229-36.
  27. Resnick MD, Bearman PS, Blum RW, et al. Protecting adolescents from harm. Findings from the National Longitudinal Study on Adolescent Health. *JAMA*. 1997 Sep 10;278(10):823-32.
  28. Boone-Heinonen J, Evenson KR, Song Y, et al. Built and socioeconomic environments: patterning and associations with physical activity in U.S. adolescents. *Int J Behav Nutr Phys Act*. 2010;7:45.
  29. Zenk SN, Schulz AJ, Matthews SA, et al. Activity space environment and dietary and physical activity behaviors: a pilot study. *Health & place*. [Research Support, N.I.H., Extramural, Research Support, U.S. Gov't, P.H.S.]. 2011 Sep;17(5):1150-61.
  30. Hillier A, Cannuscio C, Karpyn A, et al. How Far Do Low-Income Parents Travel to Shop for Food? Empirical Evidence from Two Urban Neighborhoods. *Urban Geography*. 2011;32(5):712-29.
  31. Oliver LN, Schuurman N, Hall AW. Comparing circular and network buffers to examine the influence of land use on walking for leisure and errands. *Int J Health Geogr*. 2007;6:41.
  32. CDC. Children's Food Environment State Indicator Report: Centers for Disease Control and Prevention 2011.
  33. Feng J, Glass TA, Curriero FC, et al. The built environment and obesity: a systematic review of the epidemiologic evidence. *Health & place*. [Review]. 2010 Mar;16(2):175-90.



- 1  
2  
3 34. Boone-Heinonen J, Gordon-Larsen P. What is the relevant neighborhood area for  
4 detecting built environment relationships with physical activity? *submitted to Health & Place*.  
5  
6 2010.  
7  
8  
9  
10 35. Subramanian SV, Chen JT, Rehkopf DH, et al. Racial disparities in context: a multilevel  
11 analysis of neighborhood variations in poverty and excess mortality among black populations in  
12 Massachusetts. *Am J Public Health*. 2005 Feb;95(2):260-5.  
13  
14  
15  
16  
17 36. U.S. Census Bureau. Statistical Brief- Poverty Areas. 1995 [cited 2010 1/19/10];  
18 Available from: <http://www.census.gov/population/socdemo/statbriefs/povarea.html>.  
19  
20  
21  
22 37. Messer LC, Laraia BA, Kaufman JS, et al. The development of a standardized  
23 neighborhood deprivation index. *Journal of urban health : bulletin of the New York Academy of*  
24 *Medicine*. [Research Support, Non-U.S. Gov't, Research Support, U.S. Gov't, Non-P.H.S.,  
25 Research Support, U.S. Gov't, P.H.S.]. 2006 Nov;83(6):1041-62.  
26  
27  
28  
29  
30  
31 38. McGarigal K., Cushman S.A., Neel M.C., et al. FRAGSTATS: Spatial Pattern Analysis  
32 Program for Categorical Maps. In: University of Massachusetts A, editor.2002.  
33  
34  
35  
36 39. Clarke P. When can group level clustering be ignored? Multilevel models versus single-  
37 level models with sparse data. *J Epidemiol Community Health*. 2008 Aug;62(8):752-8.  
38  
39  
40  
41 40. Jago R, Baranowski T, Baranowski JC, et al. Distance to food stores & adolescent male  
42 fruit and vegetable consumption: mediation effects. *Int J Behav Nutr Phys Act*. 2007;4:35.  
43  
44  
45  
46 41. Morland K, Filomena S. Disparities in the availability of fruits and vegetables between  
47 racially segregated urban neighbourhoods. *Public Health Nutr*. 2007 Dec;10(12):1481-9.  
48  
49  
50  
51 42. Block JP, Scribner RA, DeSalvo KB. Fast food, race/ethnicity, and income: a geographic  
52 analysis. *Am J Prev Med*. 2004 Oct;27(3):211-7.  
53  
54  
55  
56  
57  
58  
59  
60

- 1  
2  
3  
4  
5  
6  
7  
8  
9  
10  
11  
12  
13  
14  
15  
16  
17  
18  
19  
20  
21  
22  
23  
24  
25  
26  
27  
28  
29  
30  
31  
32  
33  
34  
35  
36  
37  
38  
39  
40  
41  
42  
43  
44  
45  
46  
47  
48  
49  
50  
51  
52  
53  
54  
55  
56  
57  
58  
59  
60
43. Zenk SN, Powell LM. US secondary schools and food outlets. *Health Place*. 2008 Jun;14(2):336-46.
44. Borradaile KE, Sherman S, Vander Veur SS, et al. Snacking in children: the role of urban corner stores. *Pediatrics*. 2009 Nov;124(5):1293-8.
45. Lucan SC, Karpyn A, Sherman S. Storing empty calories and chronic disease risk: snack-food products, nutritive content, and manufacturers in Philadelphia corner stores. *J Urban Health*. May;87(3):394-409.
46. The Brookings Institution Metropolitan Policy Program. State of Metropolitan America: on the front lines of demographic transformation. Washington DC: The Brookings Institution 2010.
47. Lovasi GS, Hutson MA, Guerra M, et al. Built environments and obesity in disadvantaged populations. *Epidemiol Rev*. 2009;31:7-20.
48. Raja S, Ma C, Yadav P. Beyond Food Deserts: Measuring and Mapping Racial Disparities in Neighborhood Food Environments. *Journal of Planning Education and Research*. 2008;27:469-82.
49. Liese AD, Colabianchi N, Lamichhane AP, et al. Validation of 3 food outlet databases: completeness and geospatial accuracy in rural and urban food environments. *American journal of epidemiology*. [Evaluation Studies, Research Support, N.I.H., Extramural, Validation Studies]. 2010 Dec 1;172(11):1324-33.
50. Hoehner CM, Schootman M. Concordance of commercial data sources for neighborhood-effects studies. *Journal of urban health : bulletin of the New York Academy of Medicine*. [Research Support, N.I.H., Extramural, Research Support, Non-U.S. Gov't]. 2010 Jul;87(4):713-25.

- 1  
2  
3 51. Longacre MR, Primack BA, Owens PM, et al. Public directory data sources do not  
4 accurately characterize the food environment in two predominantly rural states. *Journal of the*  
5  
6 *American Dietetic Association*. [Research Support, N.I.H., Extramural, Research Support, Non-  
7  
8 U.S. Gov't]. 2011 Apr;111(4):577-82.  
9  
10  
11  
12 52. Powell LM, Han E, Zenk SN, et al. Field validation of secondary commercial data  
13 sources on the retail food outlet environment in the U.S. *Health & place*. [Research Support,  
14  
15 Non-U.S. Gov't, Validation Studies]. 2011 Sep;17(5):1122-31.  
16  
17  
18  
19 53. Cummins S, Macintyre S. Are secondary data sources on the neighbourhood food  
20 environment accurate? Case-study in Glasgow, UK. *Preventive medicine*. [Research Support,  
21  
22 Non-U.S. Gov't, Validation Studies]. 2009 Dec;49(6):527-8.  
23  
24  
25  
26 54. A.C. Nielsen Company. FMI/ACNielsen Study: Winning Strategies for Your Most  
27 Important Shoppers2005.  
28  
29  
30  
31 55. NYC Department of Health and Mental Hygiene. NYC Green Cart. New York City2008  
32 [cited 2010]; Available from:  
33  
34 [http://www.nyc.gov/html/doh/html/cdp/cdp\\_pan\\_green\\_carts.shtml](http://www.nyc.gov/html/doh/html/cdp/cdp_pan_green_carts.shtml).  
35  
36  
37  
38 56. The Reinvestment Fund. Commercial Real Estate: Supermarkets. New Jersey2010 [cited  
39 2010]; Available from: <http://www.trfund.com/financing/realestate/supermarkets.html>.  
40  
41  
42  
43 57. Lombino D, Patterson J. New York City Industrial Development Agency Approves  
44 Incentives for First Two Supermarkets Under the Fresh Program. New York City2010 [cited  
45 2010]; Available from:  
46  
47 <http://www.nycedc.com/PressRoom/PressReleases/Pages/IDAApprovesIncentivesforSupermarke>  
48  
49  
50  
51  
52  
53  
54  
55  
56  
57  
58  
59  
60

1  
2  
3 58. Stephens C. State of Louisiana Approves \$7 Million for Fresh Food Initiative in New  
4 Orleans. Louisisana2009 [cited 2010]; Available from:

5  
6  
7  
8 <http://www.lra.louisiana.gov/index.cfm?md=newsroom&tmp=detail&articleID=582>.

9  
10 59. The Food Trust. Pennsylvania Fresh Food Financing Initiative. Philadelphia2004 [cited  
11 2010]; Available from: <http://www.thefoodtrust.org/php/programs/fffi.php>.

12  
13 60. Los Angeles City Clerk. FAST FOOD RESTAURANTS / INTERIM CONTROL  
14 ORDINANCE / WEST-ADAMS-BALDWIN HILLS-LEIMERT, SOUTH AND SOUTHEAST  
15 LOS ANGELES. Los Angeles: LA City Clerk; 2008 [cited 2010]; Available from:

16  
17  
18  
19  
20  
21  
22 <http://cityclerk.lacity.org/lacityclerkconnect/index.cfm?fa=ccfi.viewrecord&cfnumber=07->  
23  
24  
25 [1658&CFID=16806974&CFTOKEN=73b760e131fb720-4A7614CB-C1C7-C84F-](http://cityclerk.lacity.org/lacityclerkconnect/index.cfm?fa=ccfi.viewrecord&cfnumber=07-1658&CFID=16806974&CFTOKEN=73b760e131fb720-4A7614CB-C1C7-C84F-F1E8474351348CDC&jsessionid=f030cb1129cc179c6eed6440245a58561e87)  
26  
27 [F1E8474351348CDC&jsessionid=f030cb1129cc179c6eed6440245a58561e87](http://cityclerk.lacity.org/lacityclerkconnect/index.cfm?fa=ccfi.viewrecord&cfnumber=07-1658&CFID=16806974&CFTOKEN=73b760e131fb720-4A7614CB-C1C7-C84F-F1E8474351348CDC&jsessionid=f030cb1129cc179c6eed6440245a58561e87).

28  
29 61. letsmove.gov. Accessing Healthy & Affordable Food. Washington, D.C.2010 [cited  
30 2010 4/5/10]; Available from: <http://letsmove.gov/accessing/index.html>.

1  
2  
3  
4  
5  
6  
7  
8  
9  
10  
11  
12  
13  
14  
15  
16  
17  
18  
19  
20  
21  
22  
23  
24  
25  
26  
27  
28  
29  
30  
31  
32  
33  
34  
35  
36  
37  
38  
39  
40  
41  
42  
43  
44  
45  
46  
47  
48  
49

**Figure 1.** Predicted neighborhood food resource availability (count per 10,000 population) for various neighborhood poverty<sup>a</sup> and minority population<sup>b</sup> levels<sup>c</sup>

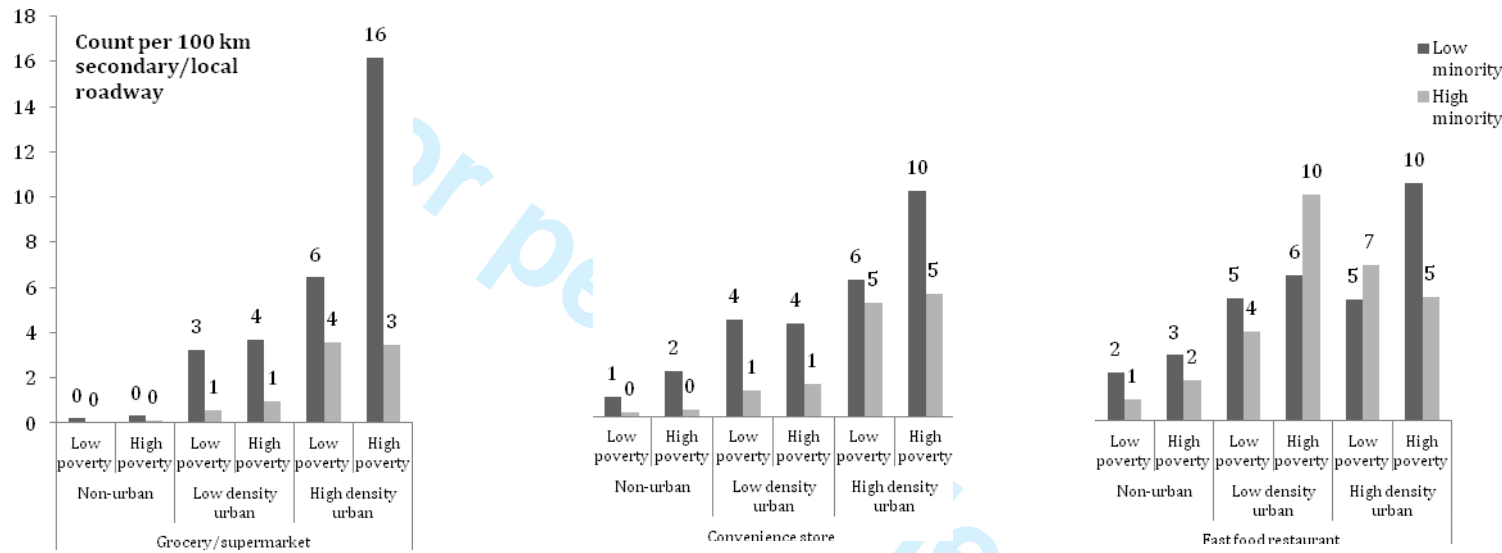

<sup>a</sup> Greater than 20% of population below the federal poverty level

<sup>b</sup> Percent non-Hispanic White population. Non-urban (Low:0-74.7%, Medium: 74.8-96.3%, High: 96.4-100%), Low density urban (Low: 0-70.7%, Medium: 70.8-90.5% High: 90.6-100%) High density urban (Low: 0-31%, Medium: 31.1-63.7%, High: 63.8-10%)

<sup>c</sup> National Longitudinal Study of Adolescent Health Wave III (young adulthood; 2001-02), corrected for clustering and weighted for representation. Estimated from urbanicity-stratified regression modeling food resource availability (within 3k network buffer) as a function of neighborhood poverty status (>20% population below federal poverty level, compared to ≤20% of population below federal poverty level), with neighborhood poverty\*neighborhood minority interactions. For simplicity, predictions for medium neighborhood minority population are not reported;

Appendix A. Detailed food resource definitions based on 4- and 8-digit Standard Industrial Classification (SIC) codes

| Food Resource Type          | SIC subgroup                    | SIC                         | Description                                |                                                              |
|-----------------------------|---------------------------------|-----------------------------|--------------------------------------------|--------------------------------------------------------------|
| Fast food chain & non-chain | Fast food chain (5812)          | 58120307                    | Fast-food restaurant, chain                |                                                              |
|                             |                                 | 58120601                    | Pizzeria, chain                            |                                                              |
|                             | Fast food non-chain (5812)      | 58120300                    | Fast food restaurants and stands           |                                                              |
|                             |                                 | 58120301                    | Box lunch stand                            |                                                              |
|                             |                                 | 58120302                    | Carry-out only (except pizza) restaurant   |                                                              |
|                             |                                 | 58120303                    | Chili stand                                |                                                              |
|                             |                                 | 58120304                    | Coffee shop                                |                                                              |
|                             |                                 | 58120305                    | Delicatessen (eating places)               |                                                              |
|                             |                                 | 58120306                    | Drive-in restaurant                        |                                                              |
|                             |                                 | 58120308                    | Fast-food restaurant, independent          |                                                              |
|                             |                                 | 58120309                    | Food bars                                  |                                                              |
|                             |                                 | 58120310                    | Grills (eating places)                     |                                                              |
|                             |                                 | 58120311                    | Hamburger stand                            |                                                              |
|                             |                                 | 58120312                    | Hot dog stand                              |                                                              |
|                             |                                 | 58120313                    | Sandwiches and submarines shop             |                                                              |
|                             |                                 | 58120314                    | Snack bar                                  |                                                              |
| 58120315                    | Snack shop                      |                             |                                            |                                                              |
|                             | 58120600                        | Pizza restaurants           |                                            |                                                              |
|                             | 58120602                        | Pizzeria, independent       |                                            |                                                              |
| Grocery/Supermarkets        | Grocery stores chain (5411)     | 54119904                    | Grocery stores, chain                      |                                                              |
|                             |                                 | 54119905                    | Grocery stores, independent                |                                                              |
|                             | Grocery stores non-chain (5411) | 54110000                    | Grocery stores                             |                                                              |
|                             |                                 | 54119900                    | Grocery stores, nec                        |                                                              |
|                             |                                 | 54119903                    | Frozen food and freezer plans, except meat |                                                              |
|                             | Grocery stores other (5411)     | 53999903                    | Country general stores                     |                                                              |
|                             |                                 | Supermarkets smaller (5411) | 54110101                                   | Supermarkets, chain                                          |
|                             |                                 |                             | 54110103                                   | Supermarkets, greater than 100,000 square feet (hypermarket) |
|                             |                                 | Supermarkets larger         | 54110102                                   | Supermarkets,                                                |

|                    |                    |          |                            |
|--------------------|--------------------|----------|----------------------------|
|                    | (5411)             |          | independent                |
|                    |                    |          | Supermarkets, 55,000 -     |
|                    |                    |          | 65,000 square feet         |
|                    |                    | 54110104 | (superstore)               |
|                    |                    |          | Supermarkets, 66,000 -     |
|                    |                    | 54110105 | 99,000 square feet         |
|                    | Supermarkets other |          |                            |
|                    | (5411)             | 54110100 | Supermarkets               |
|                    | Convenience Stores |          |                            |
| Convenience stores | (5411/5331/5541)   | 53310000 | Variety stores             |
|                    |                    | 54110200 | Convenience stores         |
|                    |                    |          | Convenience stores,        |
|                    |                    | 54110201 | chain                      |
|                    |                    |          | Convenience stores,        |
|                    |                    | 54110202 | independent                |
|                    |                    | 55410000 | Gasoline service stations  |
|                    |                    |          | Gasoline service stations, |
|                    |                    | 55419900 | nec                        |
|                    |                    | 55419901 | Filling stations, gasoline |

Appendix B. Means and (SD) of alternate measures of food resources availability<sup>a,b</sup>, National Longitudinal Study of Adolescent Health, Wave III (2001-2), n=13,995, by urbanicity<sup>c</sup>

| Neighborhood                                         |                                                                 | Count per 10,000 population- within 3 km<br>Euclidean buffer |                             |                       |              | Distance to nearest outlet (km)- within 8 km<br>Euclidean buffer |                       |             |
|------------------------------------------------------|-----------------------------------------------------------------|--------------------------------------------------------------|-----------------------------|-----------------------|--------------|------------------------------------------------------------------|-----------------------|-------------|
| Percent<br>poverty<br><sup>d,f</sup><br>within<br>3k | Percent<br>minority<br>populatio<br><sup>d,e</sup><br>within 3k | N                                                            | Grocery/<br>supermarke<br>t | Convenience<br>stores | Fast food    | Grocery/<br>supermarket                                          | Convenience<br>stores | Fast food   |
| Non-urban                                            |                                                                 |                                                              |                             |                       |              | Non-urban                                                        |                       |             |
| Low                                                  | Low                                                             | 545                                                          | 0.50 (0.17)                 | 1.75 (0.77)           | 6.38 (1.16)  | 3.00 (0.56)                                                      | 2.49 (0.50)           | 2.09 (0.23) |
|                                                      | Medium                                                          | 954                                                          | 0.55 (0.13)                 | 1.17 (0.27)           | 5.51 (0.48)  | 3.05 (0.20)                                                      | 3.25 (0.19)           | 2.62 (0.16) |
|                                                      | High                                                            | 1024                                                         | 0.16 (0.06)                 | 0.94 (0.24)           | 5.00 (0.53)  | 3.25 (0.43)                                                      | 3.71 (0.42)           | 2.73 (0.17) |
| High                                                 | Low                                                             | 715                                                          | 0.58 (0.34)                 | 3.52 (2.10)           | 7.98 (0.65)  | 1.46 (0.11)                                                      | 2.56 (0.88)           | 1.94 (0.26) |
|                                                      | Medium                                                          | 306                                                          | 0.20 (0.10)                 | 0.38 (0.19)           | 9.67 (0.84)  | 1.82 (0.60)                                                      | 2.50 (0.60)           | 1.48 (0.29) |
|                                                      | High                                                            | 232                                                          | 0.42 (0.10)                 | 0.87 (0.20)           | 4.60 (0.93)  | 1.61 (0.65)                                                      | 4.47 (0.80)           | 3.92 (0.58) |
| Total                                                |                                                                 | 3,779                                                        | 0.39 (0.09)                 | 1.46 (0.48)           | 6.16 (0.34)  | 2.56 (0.29)                                                      | 3.17 (0.34)           | 2.43 (0.12) |
| Low density urban                                    |                                                                 |                                                              |                             |                       |              | Low density urban                                                |                       |             |
| Low                                                  | Low                                                             | 1320                                                         | 2.73 (0.28)                 | 3.78 (0.27)           | 5.48 (0.25)  | 1.21 (0.13)                                                      | 1.12 (0.12)           | 0.80 (0.05) |
|                                                      | Medium                                                          | 1757                                                         | 1.89 (0.15)                 | 3.06 (0.20)           | 6.32 (0.19)  | 1.80 (0.17)                                                      | 1.58 (0.11)           | 0.91 (0.03) |
|                                                      | High                                                            | 2078                                                         | 0.99 (0.17)                 | 1.99 (0.34)           | 6.44 (0.19)  | 2.53 (0.32)                                                      | 2.59 (0.32)           | 1.08 (0.05) |
| High                                                 | Low                                                             | 910                                                          | 2.59 (0.28)                 | 3.50 (0.32)           | 5.97 (0.29)  | 1.14 (0.16)                                                      | 1.01 (0.10)           | 0.73 (0.05) |
|                                                      | Medium                                                          | 477                                                          | 1.73 (0.22)                 | 2.72 (0.29)           | 9.08 (0.95)  | 1.13 (0.20)                                                      | 1.28 (0.22)           | 0.53 (0.04) |
|                                                      | High                                                            | 129                                                          | 1.23 (0.32)                 | 1.71 (0.37)           | 11.52 (1.94) | 1.54 (0.44)                                                      | 1.41 (0.35)           | 0.56 (0.07) |
| Total                                                |                                                                 | 6,676                                                        | 0.39 (0.09)                 | 2.83 (0.21)           | 6.16 (0.34)  | 2.56 (0.29)                                                      | 3.17 (0.34)           | 2.43 (0.12) |
| High density urban                                   |                                                                 |                                                              |                             |                       |              | High density urban                                               |                       |             |
| Low                                                  | Low                                                             | 767                                                          | 3.00 (0.29)                 | 3.43 (0.29)           | 4.28 (0.42)  | 0.83 (0.24)                                                      | 0.56 (0.04)           | 0.60 (0.06) |
|                                                      | Medium                                                          | 786                                                          | 3.11 (0.34)                 | 3.60 (0.26)           | 4.98 (0.22)  | 0.87 (0.16)                                                      | 0.62 (0.06)           | 0.48 (0.04) |
|                                                      | High                                                            | 870                                                          | 2.74 (0.26)                 | 4.29 (0.41)           | 6.44 (0.18)  | 1.18 (0.24)                                                      | 0.81 (0.14)           | 0.50 (0.02) |
| High                                                 | Low                                                             | 418                                                          | 3.85 (0.63)                 | 3.32 (0.43)           | 4.72 (0.36)  | 0.94 (0.20)                                                      | 0.87 (0.18)           | 0.54 (0.06) |
|                                                      | Medium                                                          | 400                                                          | 3.30 (0.83)                 | 3.30 (0.66)           | 5.17 (0.45)  | 1.19 (0.42)                                                      | 0.94 (0.15)           | 0.57 (0.06) |
|                                                      | High                                                            | 307                                                          | 3.42 (0.59)                 | 4.17 (0.53)           | 6.43 (0.51)  | 0.93 (0.28)                                                      | 0.66 (0.11)           | 0.43 (0.03) |
| Total                                                |                                                                 | 3,549                                                        | 3.10 (0.34)                 | 3.84 (0.31)           | 5.64 (0.21)  | 1.04 (0.17)                                                      | 0.76 (0.09)           | 0.51 (0.03) |

<sup>a</sup> See Appendix A for SIC codes for grocery/supermarkets, convenience stores, and fast food

<sup>b</sup> Means and SD corrected for clustering and weighted for representation.

<sup>c</sup> Non-urban: distance to Urbanized Area (UA) >0, low density urban: distance to UA=0 & % developed land cover, excluding water and ice (land developed) <=95%, high density urban: distance to UA=0 & % land developed >95%.

<sup>d</sup> Census block group

<sup>e</sup> Greater than 20% of population below the federal poverty level

<sup>f</sup> Percent non-Hispanic White population. Non-urban (Low:0-74.7%, Medium: 74.8-96.3%, High: 96.4-100%), Low density urban (Low: 0-70.7%, Medium: 70.8-90.5% High: 90.6-100%) High density urban (Low: 0-31%, Medium: 31.1-63.7%, High: 63.8-100%)



Appendix C. Associations between urbanicity-specific neighborhood minority composition<sup>a</sup> and high neighborhood poverty<sup>b</sup> and alternate measures<sup>c</sup> of availability [beta coefficient (95% CI)]<sup>d,e</sup> National Longitudinal Study of Adolescent Health, Wave III (2001-2), n=13,995, by urbanicity<sup>f</sup>

| Neighborhood                                                                                                            |                                    |                      |                      |                     |
|-------------------------------------------------------------------------------------------------------------------------|------------------------------------|----------------------|----------------------|---------------------|
| Poverty status <sup>a,g</sup>                                                                                           | Minority population <sup>b,g</sup> | Non-urban            | Low density urban    | High density urban  |
| Grocery/supermarket density (count per 10,000 population) within 3 km Euclidean buffer around each individual residence |                                    |                      |                      |                     |
| Low                                                                                                                     | Low                                | 0.0                  | 0.0                  | 0.0                 |
|                                                                                                                         | Medium                             | -0.04 (-0.40, 0.31)  | -0.92 (-1.40, -0.44) | -0.03 (-0.61, 0.55) |
|                                                                                                                         | High                               | -0.35 (-0.69, -0.02) | -1.76 (-2.35, -1.18) | -0.51 (-1.04, 0.02) |
| High                                                                                                                    | Low                                | 0.08 (-0.49, 0.66)   | -0.03 (-0.55, 0.48)  | 1.11 (0.04, 2.18)   |
|                                                                                                                         | Medium                             | -0.38 (-0.77, 0.01)  | -1.14 (-1.78, -0.50) | 0.40 (-0.94, 1.74)  |
|                                                                                                                         | High                               | -0.01 (-0.42, 0.40)  | -1.57 (-2.40, -0.74) | 0.17 (-1.21, 1.55)  |
| Distance to nearest grocery/supermarket (km) within 8 km Euclidean buffer around each individual residence              |                                    |                      |                      |                     |
| Low                                                                                                                     | Low                                | 0.0                  | 0.0                  | 0.0                 |
|                                                                                                                         | Medium                             | -0.24 (-1.22, 0.74)  | 0.52 (0.24, 0.81)    | 0.18 (-0.11, 0.47)  |
|                                                                                                                         | High                               | -0.16 (-1.45, 1.12)  | 1.09 (0.46, 1.71)    | 0.20 (-0.50, 0.89)  |
| High                                                                                                                    | Low                                | -1.43 (-2.47, -0.39) | -0.08 (-0.36, 0.20)  | 0.08 (-0.33, 0.48)  |
|                                                                                                                         | Medium                             | -0.82 (-2.50, 0.85)  | 0.26 (-0.17, 0.69)   | 0.26 (-0.28, 0.79)  |
|                                                                                                                         | High                               | -1.67 (-3.39, 0.05)  | 0.66 (0.03, 1.29)    | 0.12 (-0.52, 0.77)  |
| Convenience store density (count per 10,000 population) within 3 km Euclidean buffer around each individual residence   |                                    |                      |                      |                     |
| Low                                                                                                                     | Low                                | 0.0                  | 0.0                  | 0.0                 |
|                                                                                                                         | Medium                             | -0.70 (-2.22, 0.83)  | -0.86 (-1.36, -0.35) | 0.18 (-0.47, 0.84)  |
|                                                                                                                         | High                               | -0.84 (-2.43, 0.75)  | -1.84 (-2.58, -1.10) | 0.87 (-0.16, 1.89)  |
| High                                                                                                                    | Low                                | 1.77 (-1.33, 4.87)   | -0.09 (-0.65, 0.46)  | -0.12 (-0.95, 0.71) |
|                                                                                                                         | Medium                             | -1.48 (-3.06, 0.10)  | -1.30 (-2.06, -0.55) | -0.13 (-1.32, 1.06) |
|                                                                                                                         | High                               | -0.79 (-2.39, 0.81)  | -2.19 (-3.02, -1.36) | 0.76 (-0.44, 1.95)  |
| Distance to nearest convenience store (km) within 8 km Euclidean buffer around each individual residence                |                                    |                      |                      |                     |
| Low                                                                                                                     | Low                                | 0.0                  | 0.0                  | 0.0                 |
|                                                                                                                         | Medium                             | 0.34 (-0.35, 1.03)   | 0.35 (0.11, 0.60)    | 0.11 (-0.02, 0.24)  |
|                                                                                                                         | High                               | 0.27 (-0.67, 1.21)   | 1.12 (0.61, 1.63)    | 0.16 (-0.13, 0.45)  |
| High                                                                                                                    | Low                                | 0.33 (-1.01, 1.67)   | -0.12 (-0.32, 0.08)  | 0.32 (0.05, 0.59)   |
|                                                                                                                         | Medium                             | -0.04 (-1.22, 1.15)  | 0.49 (0.02, 0.95)    | 0.30 (0.04, 0.55)   |
|                                                                                                                         | High                               | 1.19 (-0.27, 2.64)   | 0.61 (0.17, 1.06)    | 0.08 (-0.13, 0.30)  |
| Fast food density (count per 10,000 population) within 3 km Euclidean buffer around each individual residence           |                                    |                      |                      |                     |
| Low                                                                                                                     | Low                                | 0.0                  | 0.0                  | 0.0                 |
|                                                                                                                         | Medium                             | -1.59 (-4.05, 0.87)  | 0.83 (0.28, 1.37)    | 0.56 (-0.25, 1.37)  |
|                                                                                                                         | High                               | -1.52 (-3.93, 0.88)  | 0.96 (0.33, 1.59)    | 1.91 (1.03, 2.79)   |
| High                                                                                                                    | Low                                | 1.62 (-0.61, 3.84)   | 0.51 (-0.09, 1.10)   | 0.71 (-0.21, 1.63)  |
|                                                                                                                         | Medium                             | 2.67 (-0.08, 5.41)   | 3.59 (1.57, 5.60)    | 0.99 (-0.17, 2.16)  |
|                                                                                                                         | High                               | -1.22 (-3.83, 1.40)  | 6.04 (2.11, 9.97)    | 1.89 (0.62, 3.17)   |

Distance to nearest fast food restaurant (km) within 8 km Euclidean buffer around each individual residence

|      |        |                     |                      |                      |
|------|--------|---------------------|----------------------|----------------------|
| Low  | Low    | 0.0                 | 0.0                  | 0.0                  |
|      | Medium | 0.32 (-0.06, 0.71)  | 0.03 (-0.06, 0.12)   | -0.08 (-0.18, 0.02)  |
|      | High   | 0.07 (-0.40, 0.54)  | 0.10 (0.00, 0.21)    | -0.14 (-0.24, -0.04) |
| High | Low    | -0.20 (-0.49, 0.08) | -0.05 (-0.16, 0.05)  | -0.07 (-0.14, 0.00)  |
|      | Medium | -0.44 (-0.89, 0.01) | -0.24 (-0.36, -0.13) | -0.09 (-0.22, 0.05)  |
|      | High   | 0.51 (-0.33, 1.34)  | -0.30 (-0.46, -0.13) | -0.17 (-0.28, -0.07) |

<sup>a</sup> Greater than 20% of population below the federal poverty level

<sup>b</sup> Percent non-Hispanic White population. Non-urban (Low:0-74.7%, Medium: 74.8-96.3%, High: 96.4-100%), Low density urban (Low: 0-70.7%, Medium: 70.8-90.5% High: 90.6-100%) High density urban (Low: 0-31%, Medium: 31.1-63.7%, High: 63.8-10%)

<sup>c</sup> See Appendix A for SIC codes for grocery/supermarkets, convenience stores, and fast food

<sup>d</sup> Linear regression models, controlling for percent college educate and population density (except model of count per population measure)

<sup>e</sup> Dashes represent un-estimated associations; 1) measure within network 8km in low and high-density urban areas 2) measure within network 1km in non-urban areas.

<sup>f</sup> Non-urban: distance to Urbanized Area (UA) >0, low density urban: distance to UA=0 & % developed land cover, excluding water and ice (land developed) <=95%, high density urban: distance to UA=0 & % land developed >95%.

<sup>g</sup> Census block group

STROBE 2007 (v4) checklist of items to be included in reports of observational studies in epidemiology\*  
Checklist for cohort, case-control, and cross-sectional studies (combined)

| Section/Topic             | Item # | Recommendation                                                                                                                                                                                                                                                                                                                                                                                                                                                         | Reported on page # |
|---------------------------|--------|------------------------------------------------------------------------------------------------------------------------------------------------------------------------------------------------------------------------------------------------------------------------------------------------------------------------------------------------------------------------------------------------------------------------------------------------------------------------|--------------------|
| Title and abstract        | 1      | (a) Indicate the study’s design with a commonly used term in the title or the abstract                                                                                                                                                                                                                                                                                                                                                                                 | 1                  |
|                           |        | (b) Provide in the abstract an informative and balanced summary of what was done and what was found                                                                                                                                                                                                                                                                                                                                                                    | 4                  |
| <b>Introduction</b>       |        |                                                                                                                                                                                                                                                                                                                                                                                                                                                                        |                    |
| Background/rationale      | 2      | Explain the scientific background and rationale for the investigation being reported                                                                                                                                                                                                                                                                                                                                                                                   | 6-7                |
| Objectives                | 3      | State specific objectives, including any pre-specified hypotheses                                                                                                                                                                                                                                                                                                                                                                                                      | 7                  |
| <b>Methods</b>            |        |                                                                                                                                                                                                                                                                                                                                                                                                                                                                        |                    |
| Study design              | 4      | Present key elements of study design early in the paper                                                                                                                                                                                                                                                                                                                                                                                                                | 8                  |
| Setting                   | 5      | Describe the setting, locations, and relevant dates, including periods of recruitment, exposure, follow-up, and data collection                                                                                                                                                                                                                                                                                                                                        | 8                  |
| Participants              | 6      | (a) <i>Cohort study</i> —Give the eligibility criteria, and the sources and methods of selection of participants. Describe methods of follow-up<br><i>Case-control study</i> —Give the eligibility criteria, and the sources and methods of case ascertainment and control selection. Give the rationale for the choice of cases and controls<br><i>Cross-sectional study</i> —Give the eligibility criteria, and the sources and methods of selection of participants | 8                  |
|                           |        | (b) <i>Cohort study</i> —For matched studies, give matching criteria and number of exposed and unexposed<br><i>Case-control study</i> —For matched studies, give matching criteria and the number of controls per case                                                                                                                                                                                                                                                 |                    |
| Variables                 | 7      | Clearly define all outcomes, exposures, predictors, potential confounders, and effect modifiers. Give diagnostic criteria, if applicable                                                                                                                                                                                                                                                                                                                               | 9-10               |
| Data sources/ measurement | 8*     | For each variable of interest, give sources of data and details of methods of assessment (measurement). Describe comparability of assessment methods if there is more than one group                                                                                                                                                                                                                                                                                   | 9-10               |
| Bias                      | 9      | Describe any efforts to address potential sources of bias                                                                                                                                                                                                                                                                                                                                                                                                              | 11, 12             |
| Study size                | 10     | Explain how the study size was arrived at                                                                                                                                                                                                                                                                                                                                                                                                                              | 8                  |
| Quantitative variables    | 11     | Explain how quantitative variables were handled in the analyses. If applicable, describe which groupings were chosen and why                                                                                                                                                                                                                                                                                                                                           | 9-10               |
| Statistical methods       | 12     | (a) Describe all statistical methods, including those used to control for confounding                                                                                                                                                                                                                                                                                                                                                                                  | 11                 |
|                           |        | (b) Describe any methods used to examine subgroups and interactions                                                                                                                                                                                                                                                                                                                                                                                                    | 11                 |
|                           |        | (c) Explain how missing data were addressed                                                                                                                                                                                                                                                                                                                                                                                                                            | 8                  |
|                           |        | (d) <i>Cohort study</i> —If applicable, explain how loss to follow-up was addressed<br><i>Case-control study</i> —If applicable, explain how matching of cases and controls was addressed                                                                                                                                                                                                                                                                              | 8                  |

|                          |     |                                                                                                                                                                                                              |                |
|--------------------------|-----|--------------------------------------------------------------------------------------------------------------------------------------------------------------------------------------------------------------|----------------|
|                          |     | <i>Cross-sectional study</i> —If applicable, describe analytical methods taking account of sampling strategy                                                                                                 |                |
|                          |     | (e) Describe any sensitivity analyses                                                                                                                                                                        | 12             |
| <b>Results</b>           |     |                                                                                                                                                                                                              |                |
| Participants             | 13* | (a) Report numbers of individuals at each stage of study—eg numbers potentially eligible, examined for eligibility, confirmed eligible, included in the study, completing follow-up, and analysed            | 19             |
|                          |     | (b) Give reasons for non-participation at each stage                                                                                                                                                         |                |
|                          |     | (c) Consider use of a flow diagram                                                                                                                                                                           |                |
| Descriptive data         | 14* | (a) Give characteristics of study participants (eg demographic, clinical, social) and information on exposures and potential confounders                                                                     | 20             |
|                          |     | (b) Indicate number of participants with missing data for each variable of interest                                                                                                                          |                |
|                          |     | (c) <i>Cohort study</i> —Summarise follow-up time (eg, average and total amount)                                                                                                                             |                |
| Outcome data             | 15* | <i>Cohort study</i> —Report numbers of outcome events or summary measures over time                                                                                                                          |                |
|                          |     | <i>Case-control study</i> —Report numbers in each exposure category, or summary measures of exposure                                                                                                         |                |
|                          |     | <i>Cross-sectional study</i> —Report numbers of outcome events or summary measures                                                                                                                           | 20             |
| Main results             | 16  | (a) Give unadjusted estimates and, if applicable, confounder-adjusted estimates and their precision (eg, 95% confidence interval). Make clear which confounders were adjusted for and why they were included | 21             |
|                          |     | (b) Report category boundaries when continuous variables were categorized                                                                                                                                    |                |
|                          |     | (c) If relevant, consider translating estimates of relative risk into absolute risk for a meaningful time period                                                                                             |                |
| Other analyses           | 17  | Report other analyses done—eg analyses of subgroups and interactions, and sensitivity analyses                                                                                                               | Appendices B-C |
| <b>Discussion</b>        |     |                                                                                                                                                                                                              |                |
| Key results              | 18  | Summarise key results with reference to study objectives                                                                                                                                                     | 13-14          |
| Limitations              | 19  | Discuss limitations of the study, taking into account sources of potential bias or imprecision. Discuss both direction and magnitude of any potential bias                                                   | 15-16          |
| Interpretation           | 20  | Give a cautious overall interpretation of results considering objectives, limitations, multiplicity of analyses, results from similar studies, and other relevant evidence                                   | 16-17          |
| Generalisability         | 21  | Discuss the generalisability (external validity) of the study results                                                                                                                                        | 17             |
| <b>Other information</b> |     |                                                                                                                                                                                                              |                |
| Funding                  | 22  | Give the source of funding and the role of the funders for the present study and, if applicable, for the original study on which the present article is based                                                | 18             |

\*Give information separately for cases and controls in case-control studies and, if applicable, for exposed and unexposed groups in cohort and cross-sectional studies.

**Note:** An Explanation and Elaboration article discusses each checklist item and gives methodological background and published examples of transparent reporting. The STROBE checklist is best used in conjunction with this article (freely available on the Web sites of PLoS Medicine at <http://www.plosmedicine.org/>, Annals of Internal Medicine at <http://www.annals.org/>, and Epidemiology at <http://www.epidem.com/>). Information on the STROBE Initiative is available at [www.strobe-statement.org](http://www.strobe-statement.org).
